# Supplementary material for: Transcriptomic profiling of host-parasite interactions in the microsporidian Trachipleistophora hominis
Source: PubMed Central journal article supplement (PMC4654818; doi:10.1186/s12864-015-1989-z), 2015-11-21

# OXIDATIVE PHOSPHORYLATION

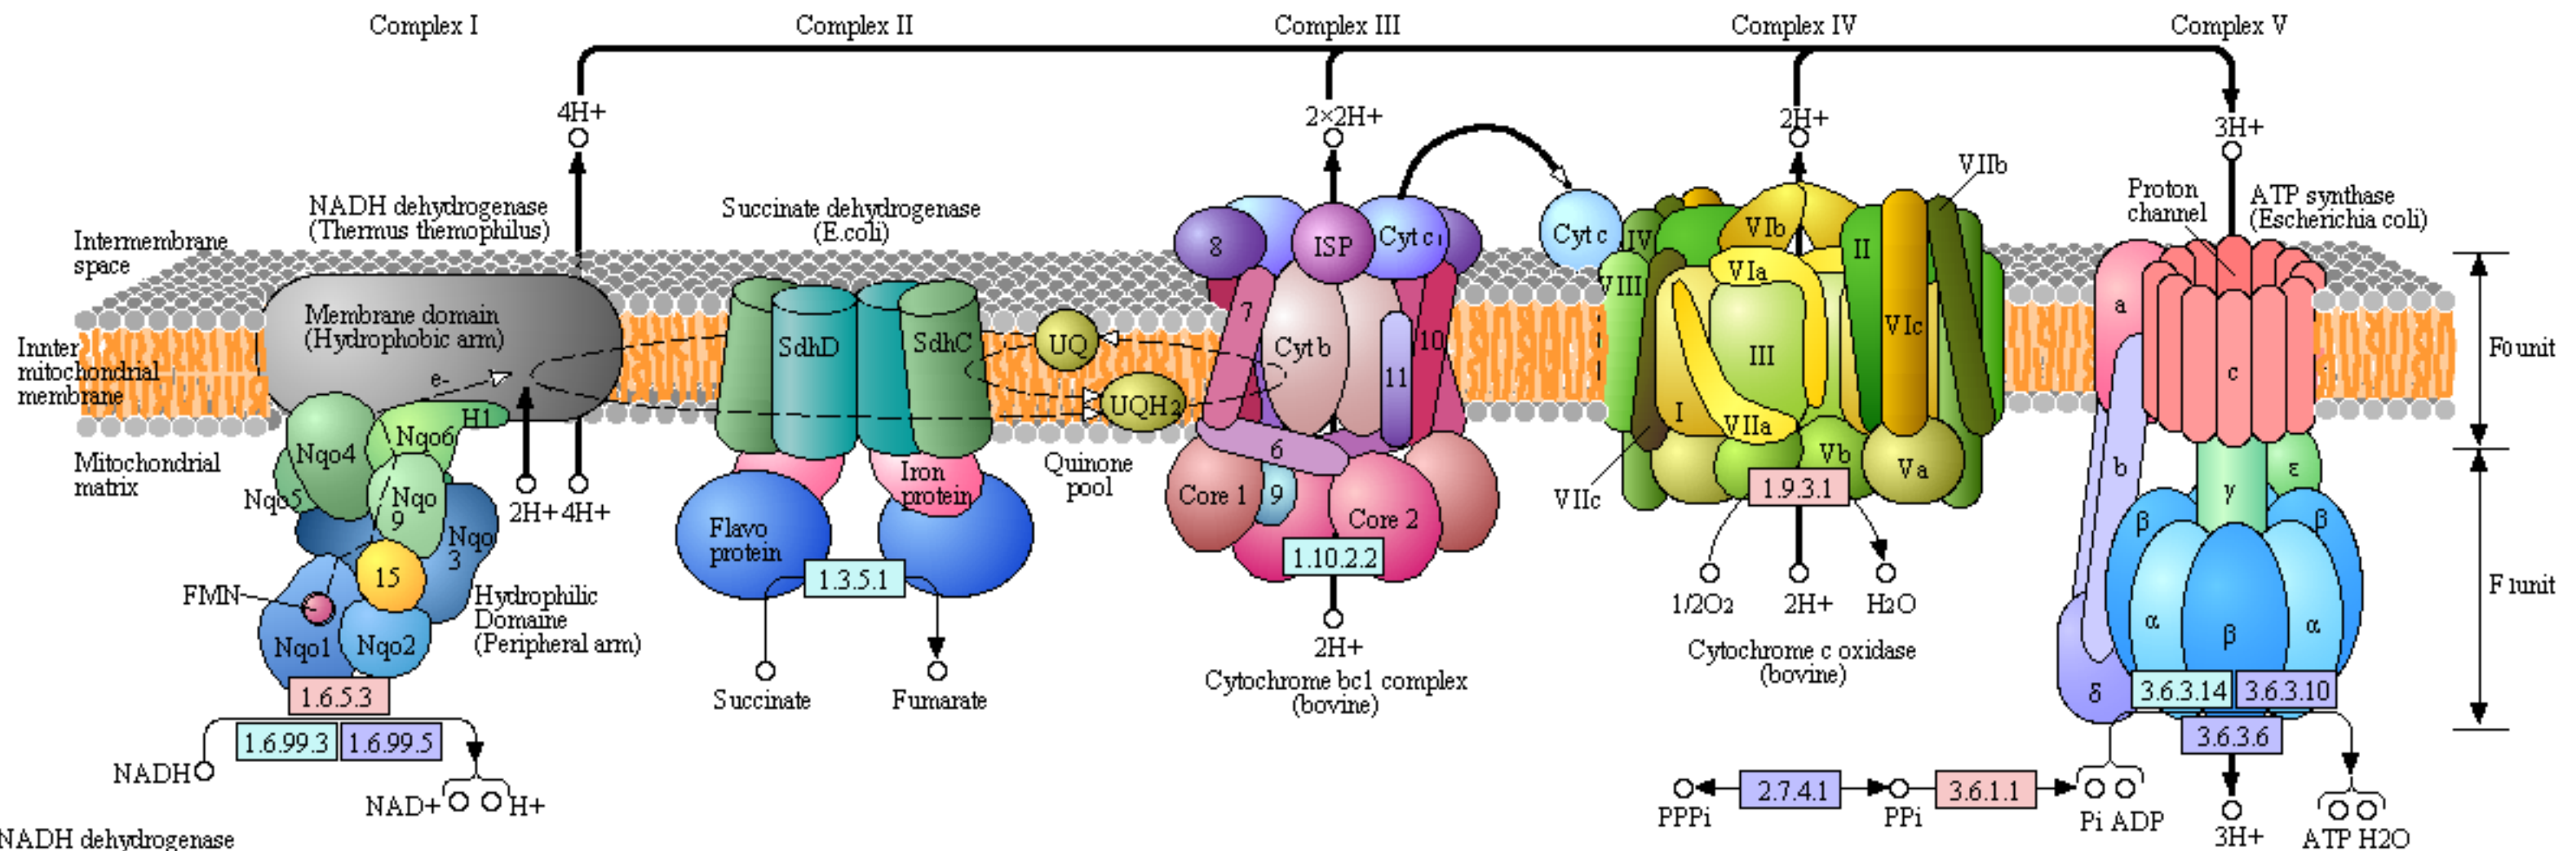

## NADH dehydrogenase

|     |        |        |        |        |        |        |        |        |        |         |         |         |         |         |      |      |      |
|-----|--------|--------|--------|--------|--------|--------|--------|--------|--------|---------|---------|---------|---------|---------|------|------|------|
| E   | ND1    | ND2    | ND3    | ND4    | ND4L   | ND5    | ND6    |        |        |         |         |         |         |         |      |      |      |
| E   | Ndufs1 | Ndufs2 | Ndufs3 | Ndufs4 | Ndufs5 | Ndufs6 | Ndufs7 | Ndufs8 | Ndufv1 | Ndufv2  | Ndufv3  |         |         |         |      |      |      |
| B/A | NuoA   | NuoB   | NuoC   | NuoD   | NuoE   | NuoF   | NuoG   | NuoH   | NuoI   | NuoJ    | NuoK    | NuoL    | NuoM    | NuoN    |      |      |      |
| B/A | NdhC   | NdhK   | NdhJ   | NdhH   | NdhA   | NdhI   | NdhG   | NdhE   | NdhF   | NdhD    | NdhB    | NdhL    | NdhM    | NdhN    | HoxE | HoxF | HoxU |
| E   | Ndufa1 | Ndufa2 | Ndufa3 | Ndufa4 | Ndufa5 | Ndufa6 | Ndufa7 | Ndufa8 | Ndufa9 | Ndufa10 | Ndufab1 | Ndufa11 | Ndufa12 | Ndufa13 |      |      |      |
| E   | Ndufb1 | Ndufb2 | Ndufb3 | Ndufb4 | Ndufb5 | Ndufb6 | Ndufb7 | Ndufb8 | Ndufb9 | Ndufb10 | Ndufb11 | Ndufc1  | Ndufc2  |         |      |      |      |

## Succinate dehydrogenase / Fumarate reductase

|     |      |      |      |      |      |      |      |      |
|-----|------|------|------|------|------|------|------|------|
| E   | SDHC | SDHD | SDHA | SDHB |      |      |      |      |
| B/A | SdhC | SdhD | SdhA | SdhB | FrdA | FrdB | FrdC | FrdD |

## Cytochrome c reductase

|       |      |       |       |      |      |      |       |  |  |
|-------|------|-------|-------|------|------|------|-------|--|--|
| E/B/A | ISP  | Cyt b | Cyt 1 |      |      |      |       |  |  |
| E     | COR1 | QCR2  | QCR6  | QCR7 | QCR8 | QCR9 | QCR10 |  |  |

## Cytochrome c oxidase

|     |       |      |      |      |      |       |       |       |       |       |       |       |       |      |       |       |       |       |
|-----|-------|------|------|------|------|-------|-------|-------|-------|-------|-------|-------|-------|------|-------|-------|-------|-------|
| E   | COX10 | COX3 | COX1 | COX2 | COX4 | COX5A | COX5B | COX6A | COX6B | COX6C | COX7A | COX7B | COX7C | COX8 | E/B/A | COX11 | COX15 | COX17 |
| B/A | CyoE  | CyoD | CyoC | CyoB | CyoA |       |       |       |       |       |       |       |       |      |       |       |       |       |
|     | CoxD  | CoxC | CoxA | CoxB |      |       |       |       |       |       |       |       |       |      |       |       |       |       |
|     | QoxD  | QoxC | QoxB | QoxA |      |       |       |       |       |       |       |       |       |      |       |       |       |       |

## Cytochrome c oxidase, cbb3-type

|   |   |    |    |     |
|---|---|----|----|-----|
| B | I | II | IV | III |
|---|---|----|----|-----|

## Cytochrome bd complex

|     |      |      |
|-----|------|------|
| B/A | CydA | CydB |
|-----|------|------|

## F-type ATPase (Bacteria)

|       |      |       |       |         |
|-------|------|-------|-------|---------|
| alpha | beta | gamma | delta | epsilon |
| a     | b    | c     |       |         |

## F-type ATPase (Eukaryotes)

|       |      |       |       |         |   |
|-------|------|-------|-------|---------|---|
| alpha | beta | gamma | delta | epsilon |   |
| OSCP  | a    | b     | c     | d       | e |
| f     | g    | f6/h  | j     | k       | 8 |

## V/A-type ATPase (Bacteria, Archaeas)

|   |   |   |   |   |   |     |
|---|---|---|---|---|---|-----|
| A | B | C | D | E | F | G/H |
| I | K |   |   |   |   |     |

## V-type ATPase (Eukaryotes)

|   |   |   |   |    |   |   |   |
|---|---|---|---|----|---|---|---|
| A | B | C | D | E  | F | G | H |
| a | c | d | e | S1 |   |   |   |

# PYRIMIDINE METABOLISM

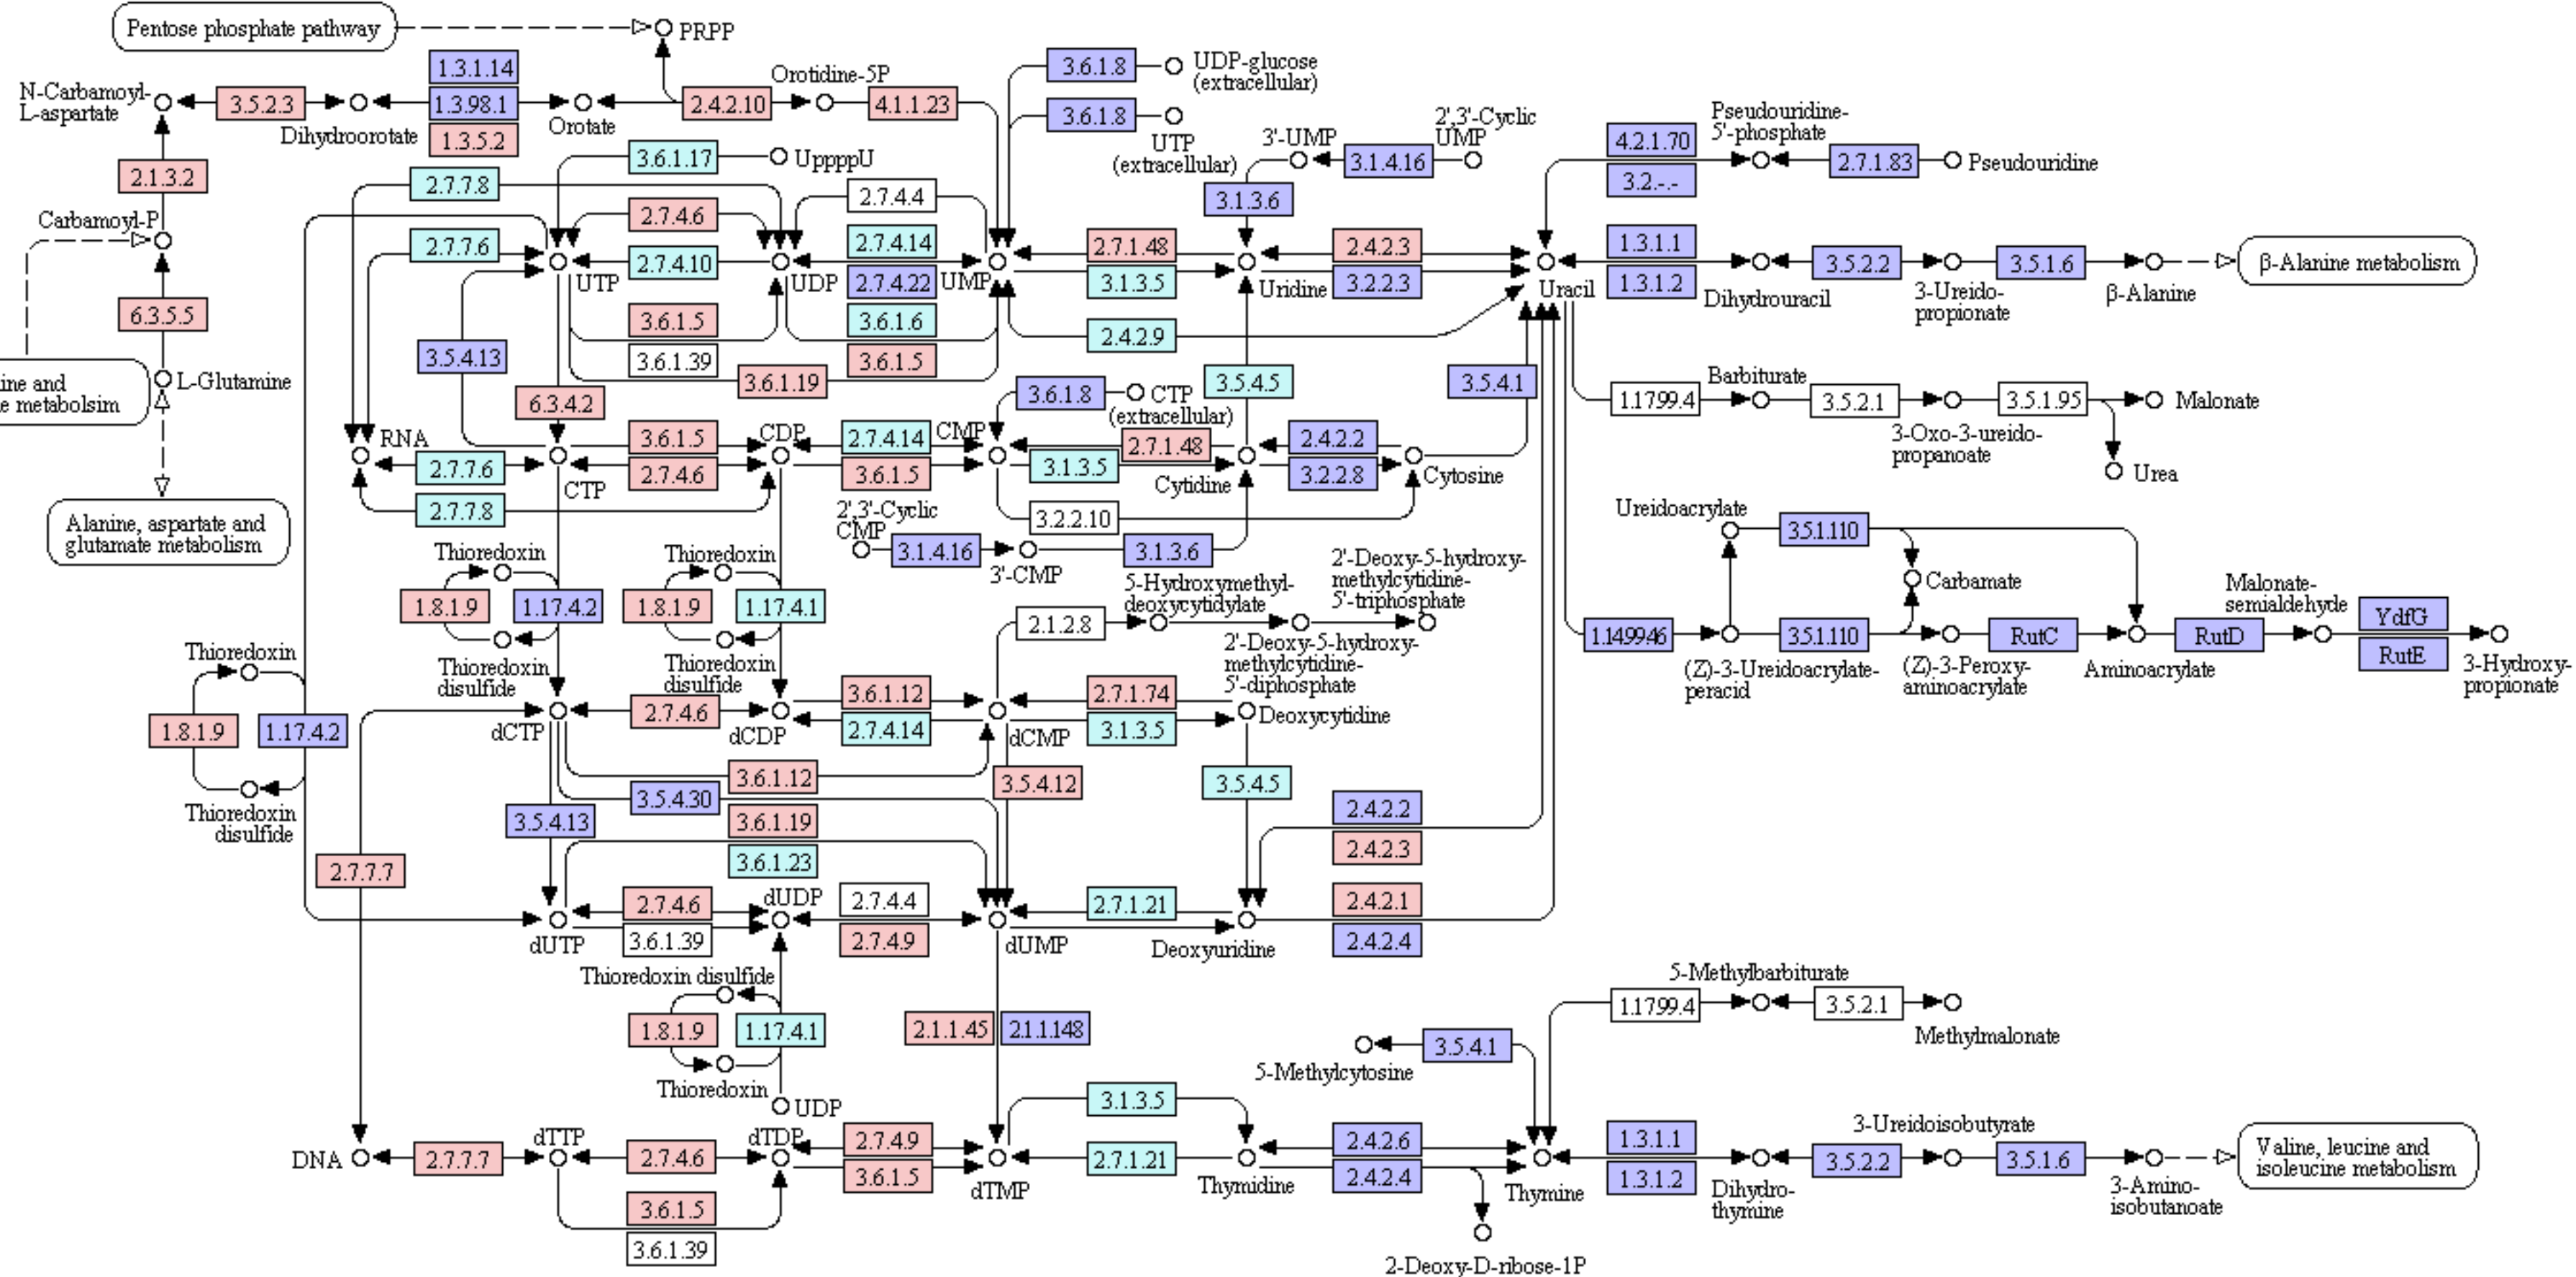

AMINO SUGAR AND NUCLEOTIDE SUGAR METABOLISM

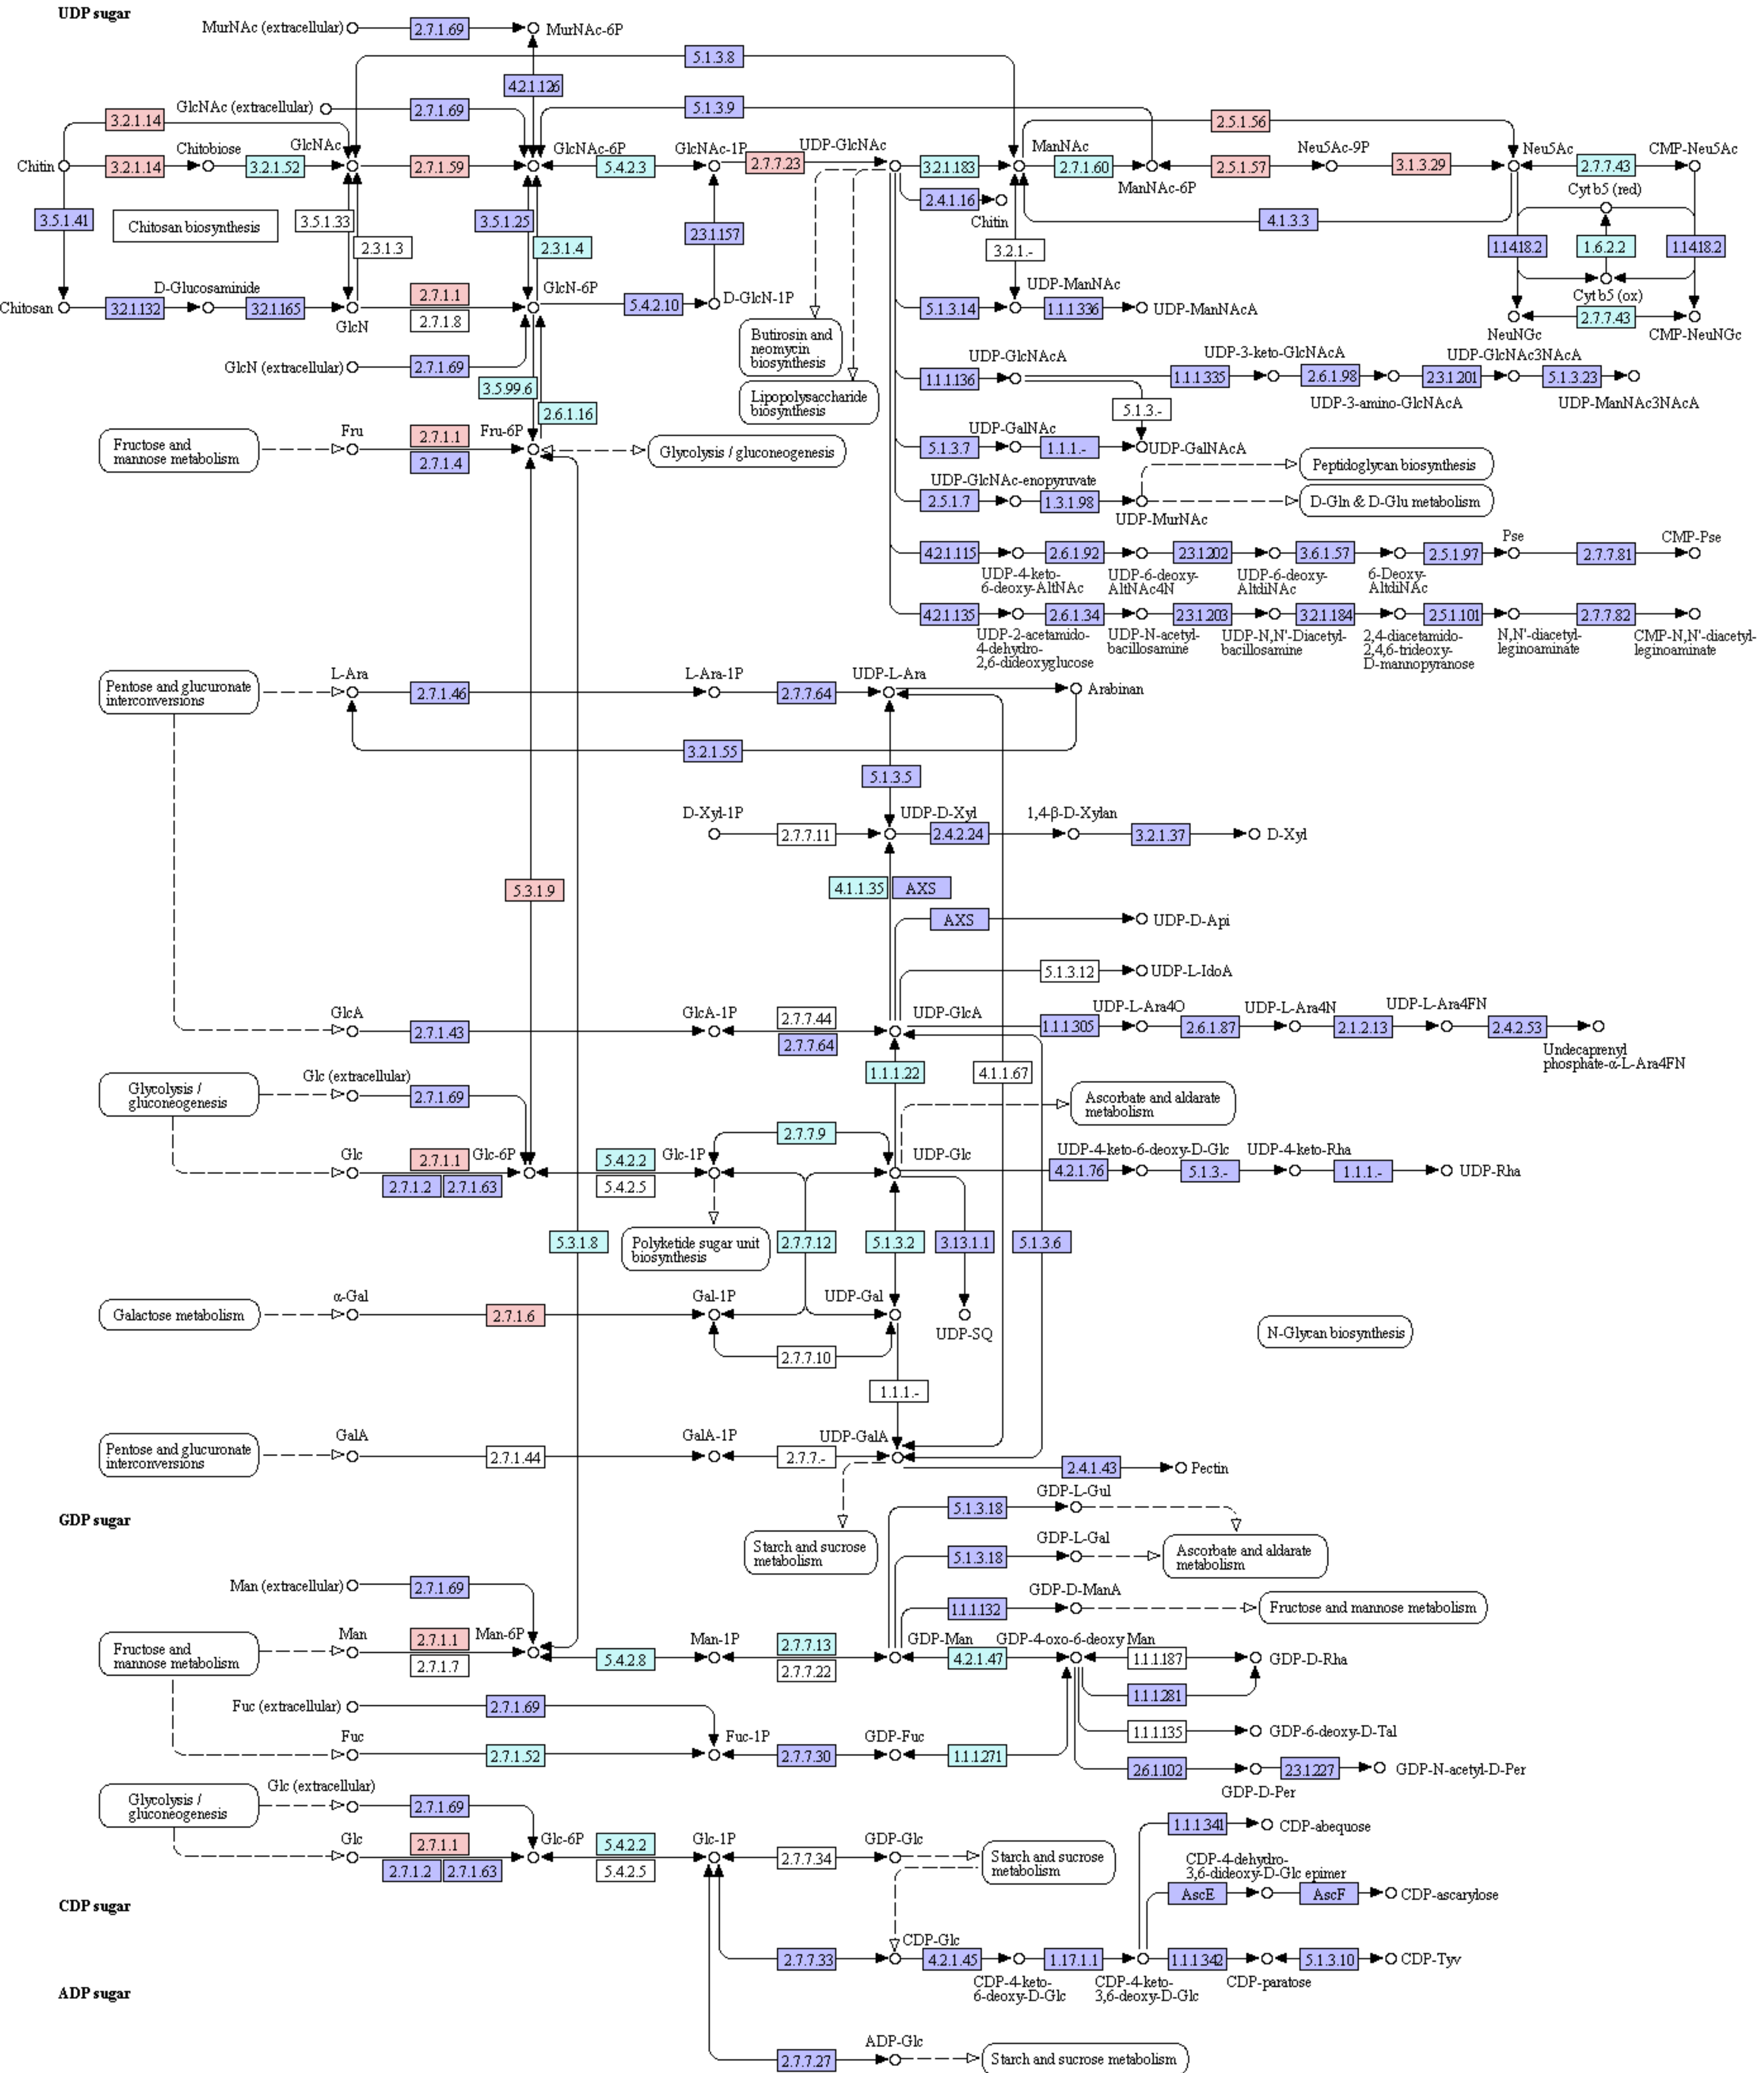

**RIBOSOME**

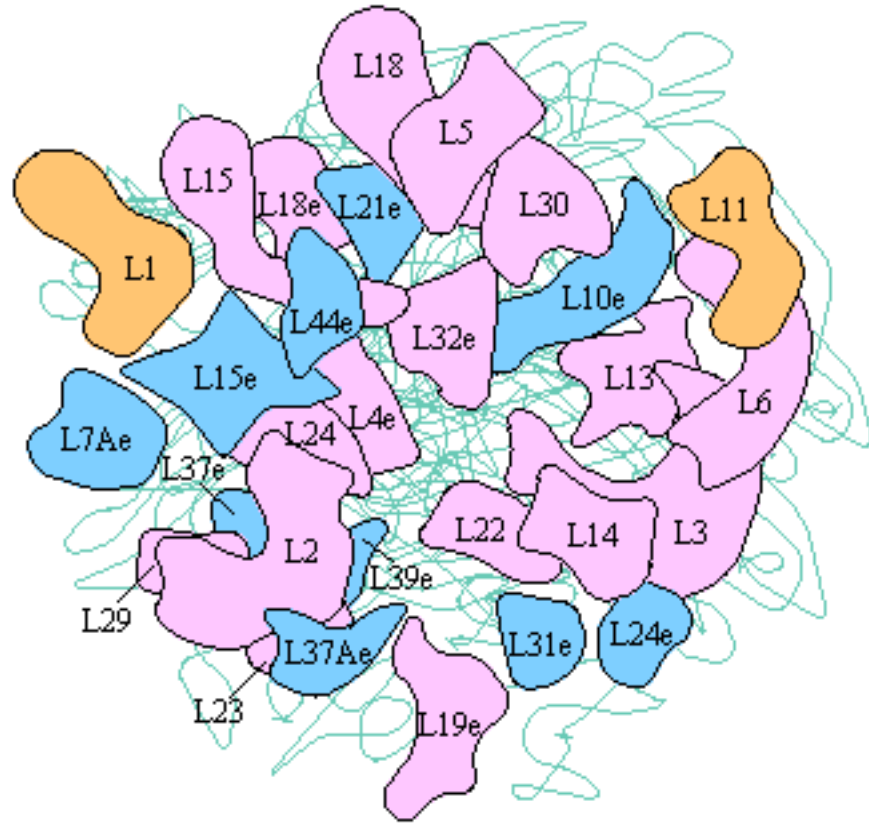

Large subunit (*Haloarcula marismortui*)

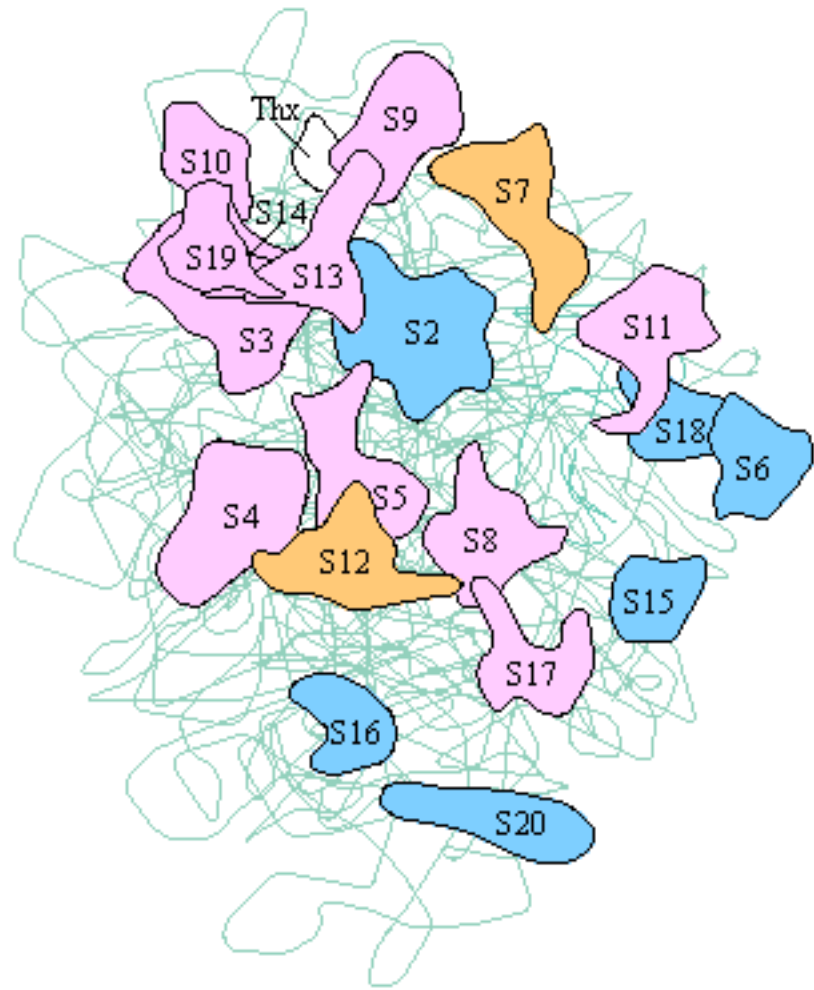

Small subunit (*Thermus aquaticus*)

**Ribosomal RNAs**

|                    |     |    |      |     |
|--------------------|-----|----|------|-----|
| Bacteria / Archaea | 23S | 5S |      | 16S |
| Eukaryotes         | 25S | 5S | 5.8S | 18S |

**Ribosomal proteins**

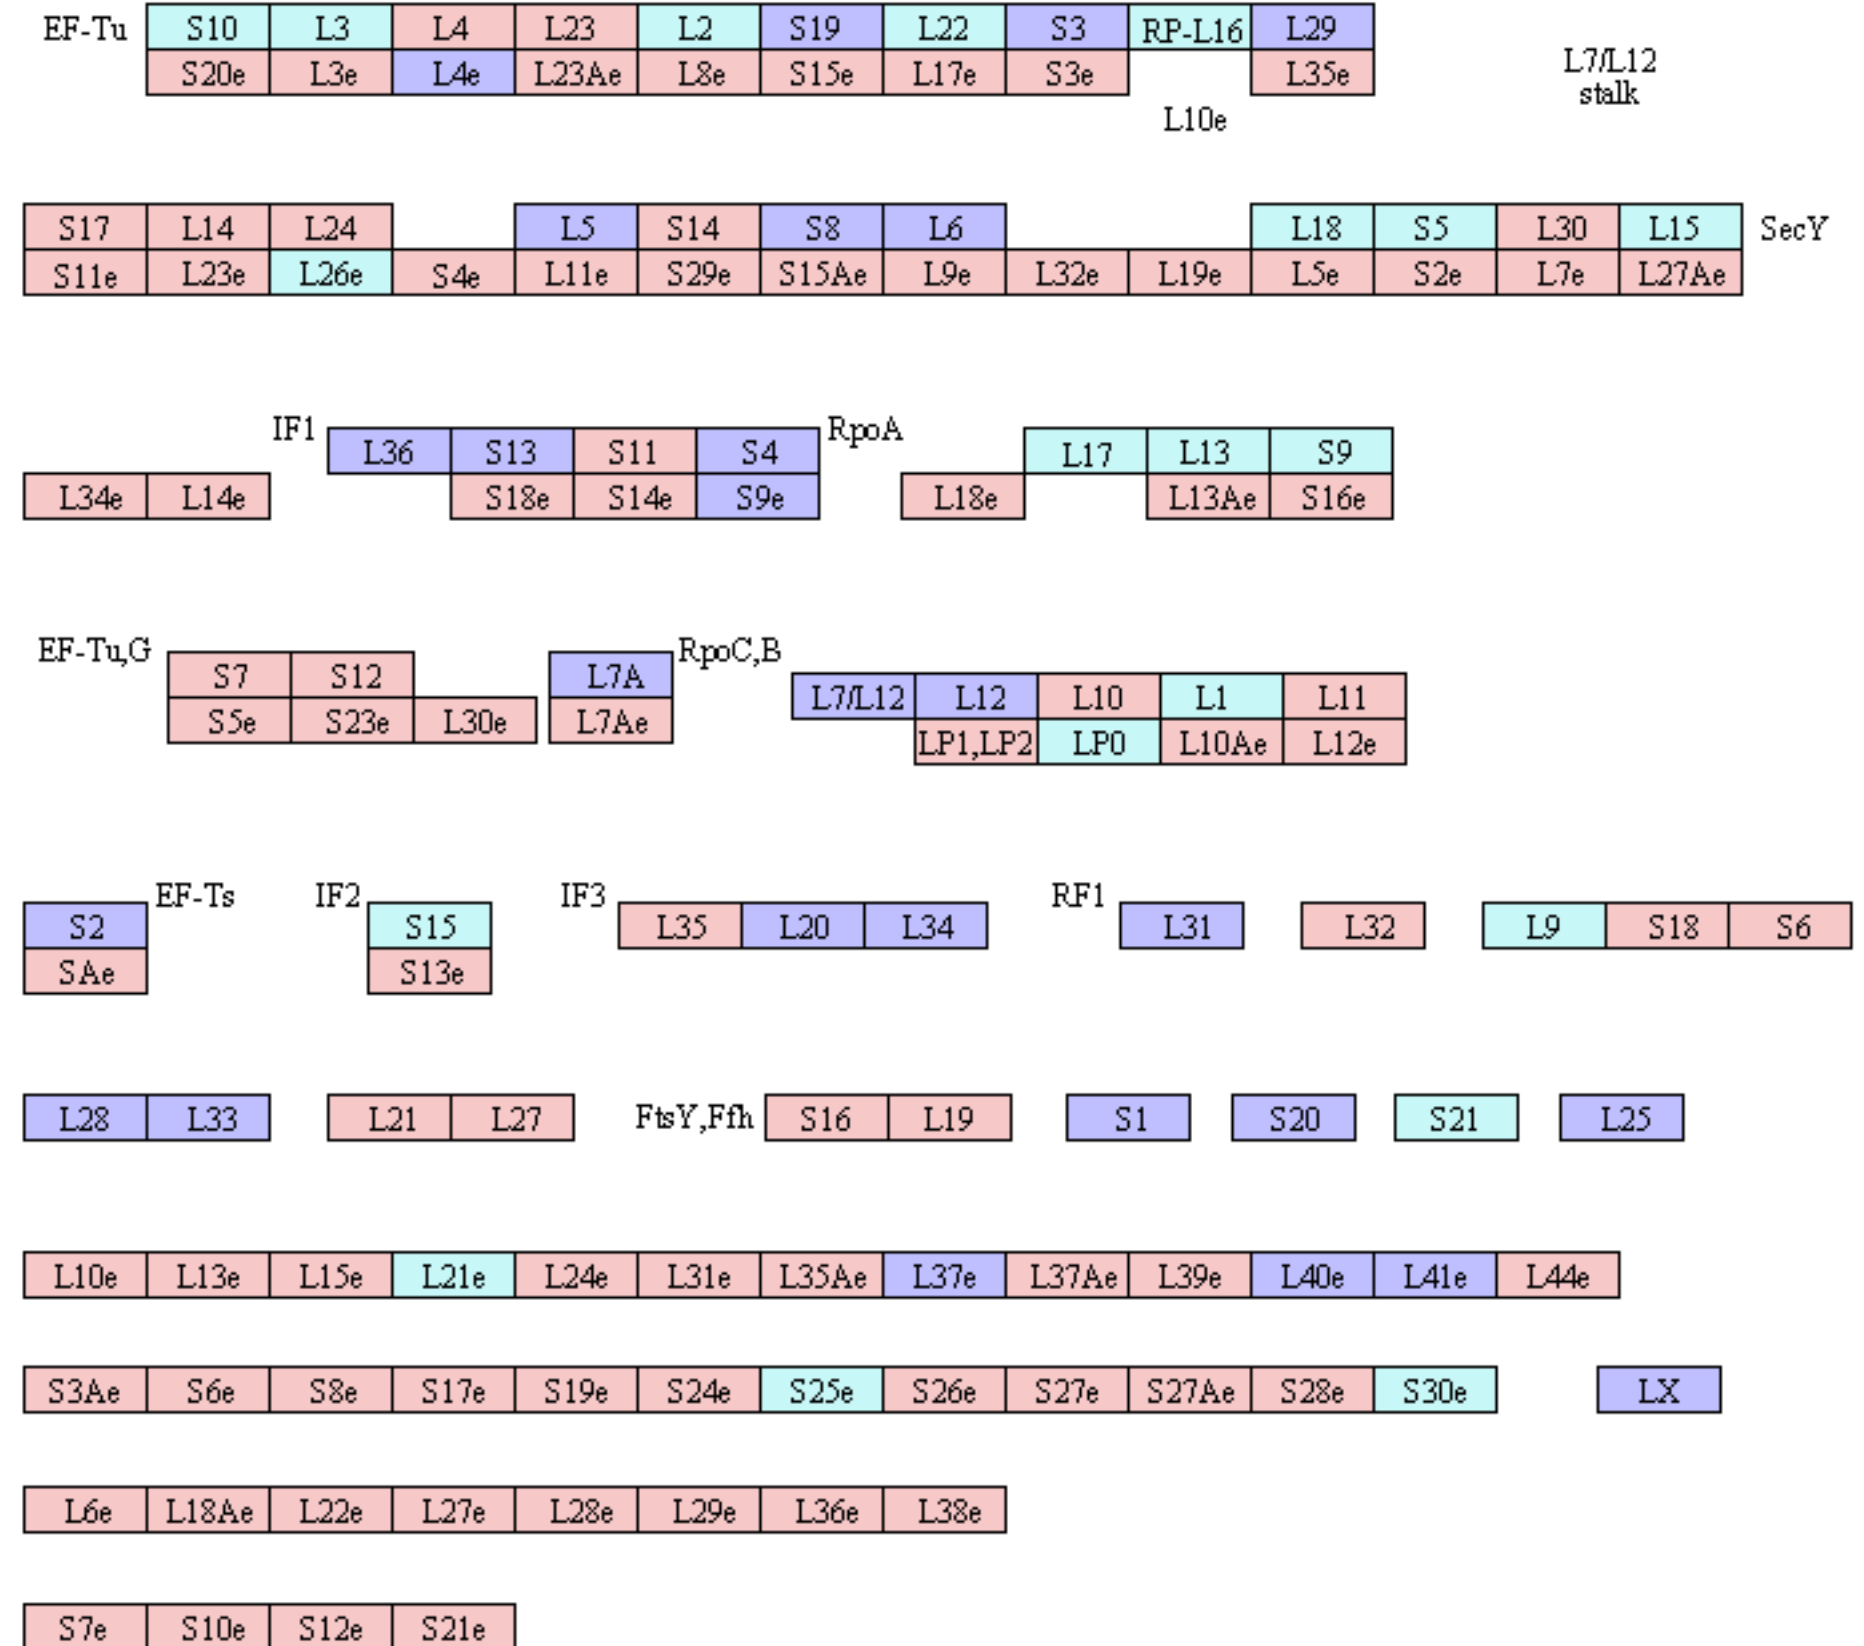

# DNA REPLICATION

## Replication complex (Prokaryotes)

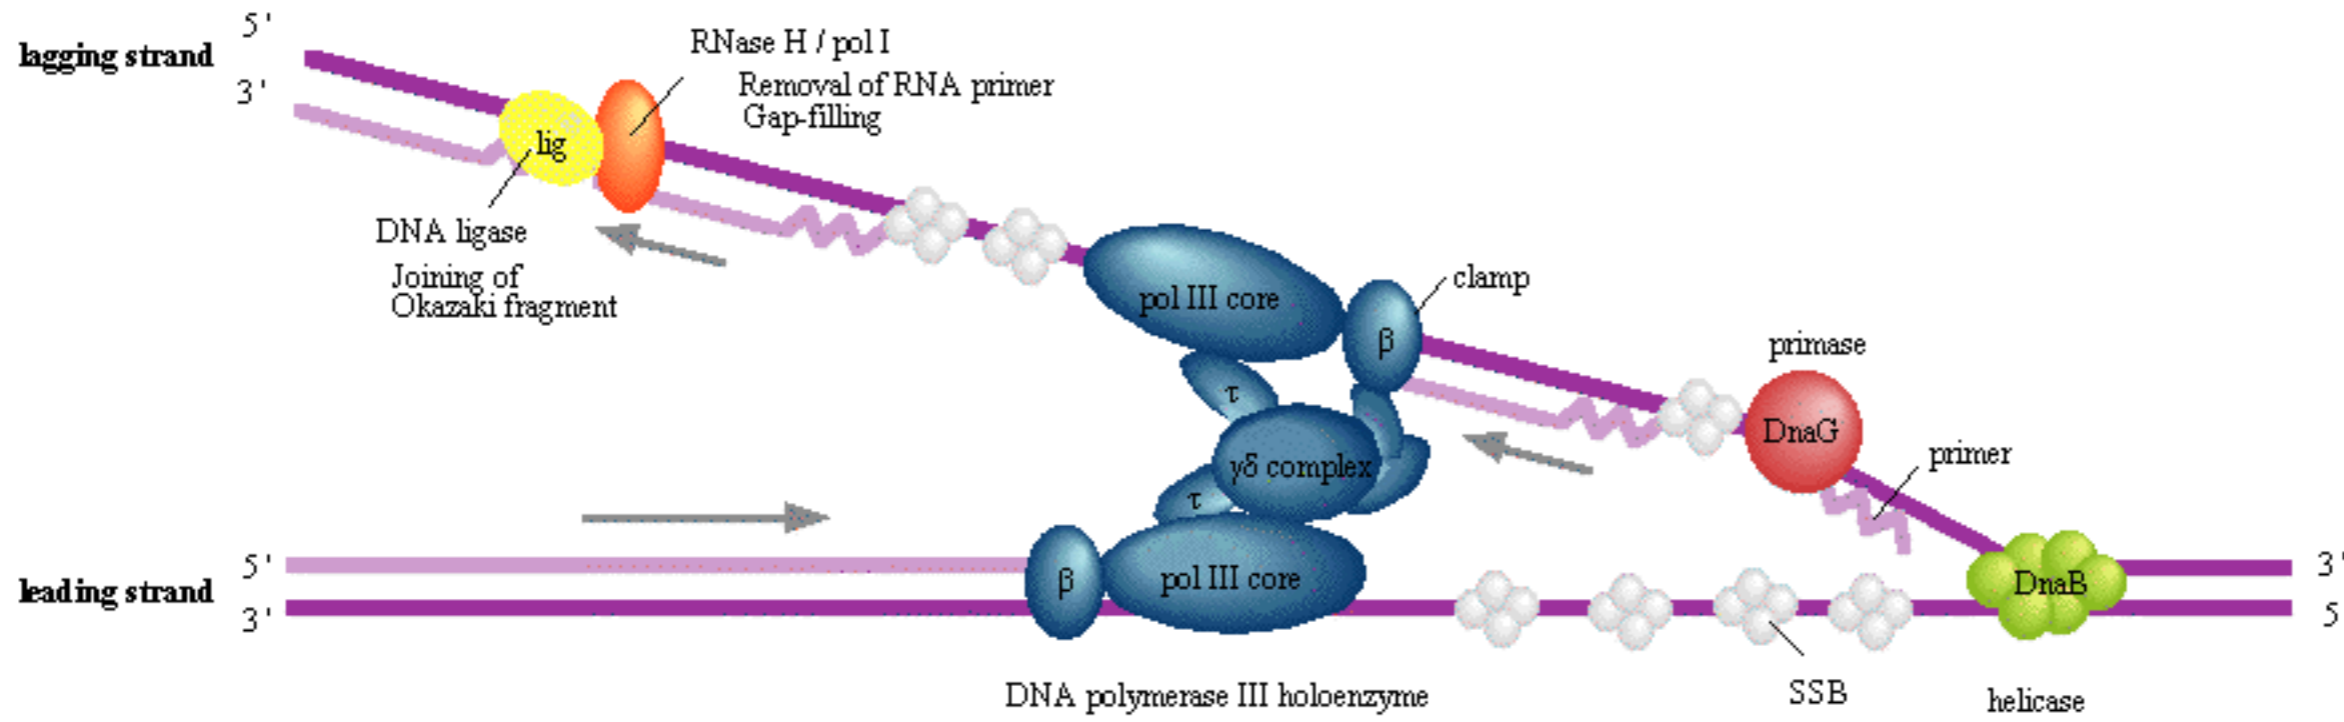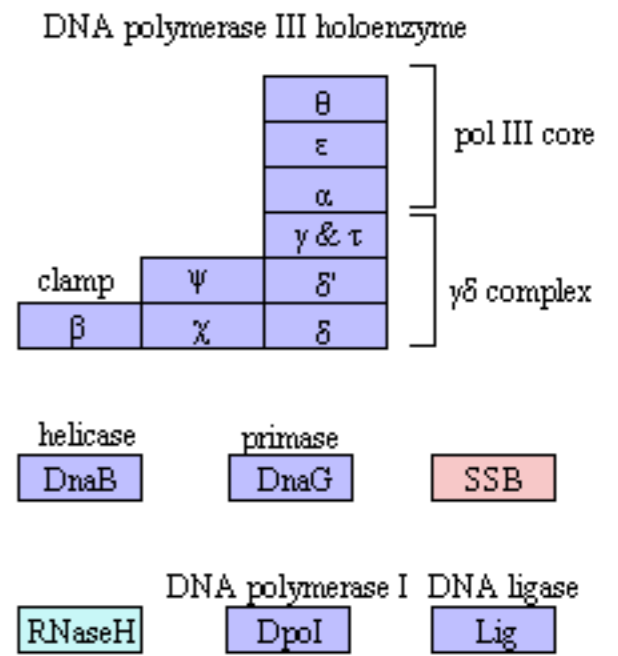

## Replication complex (Eukaryotes)

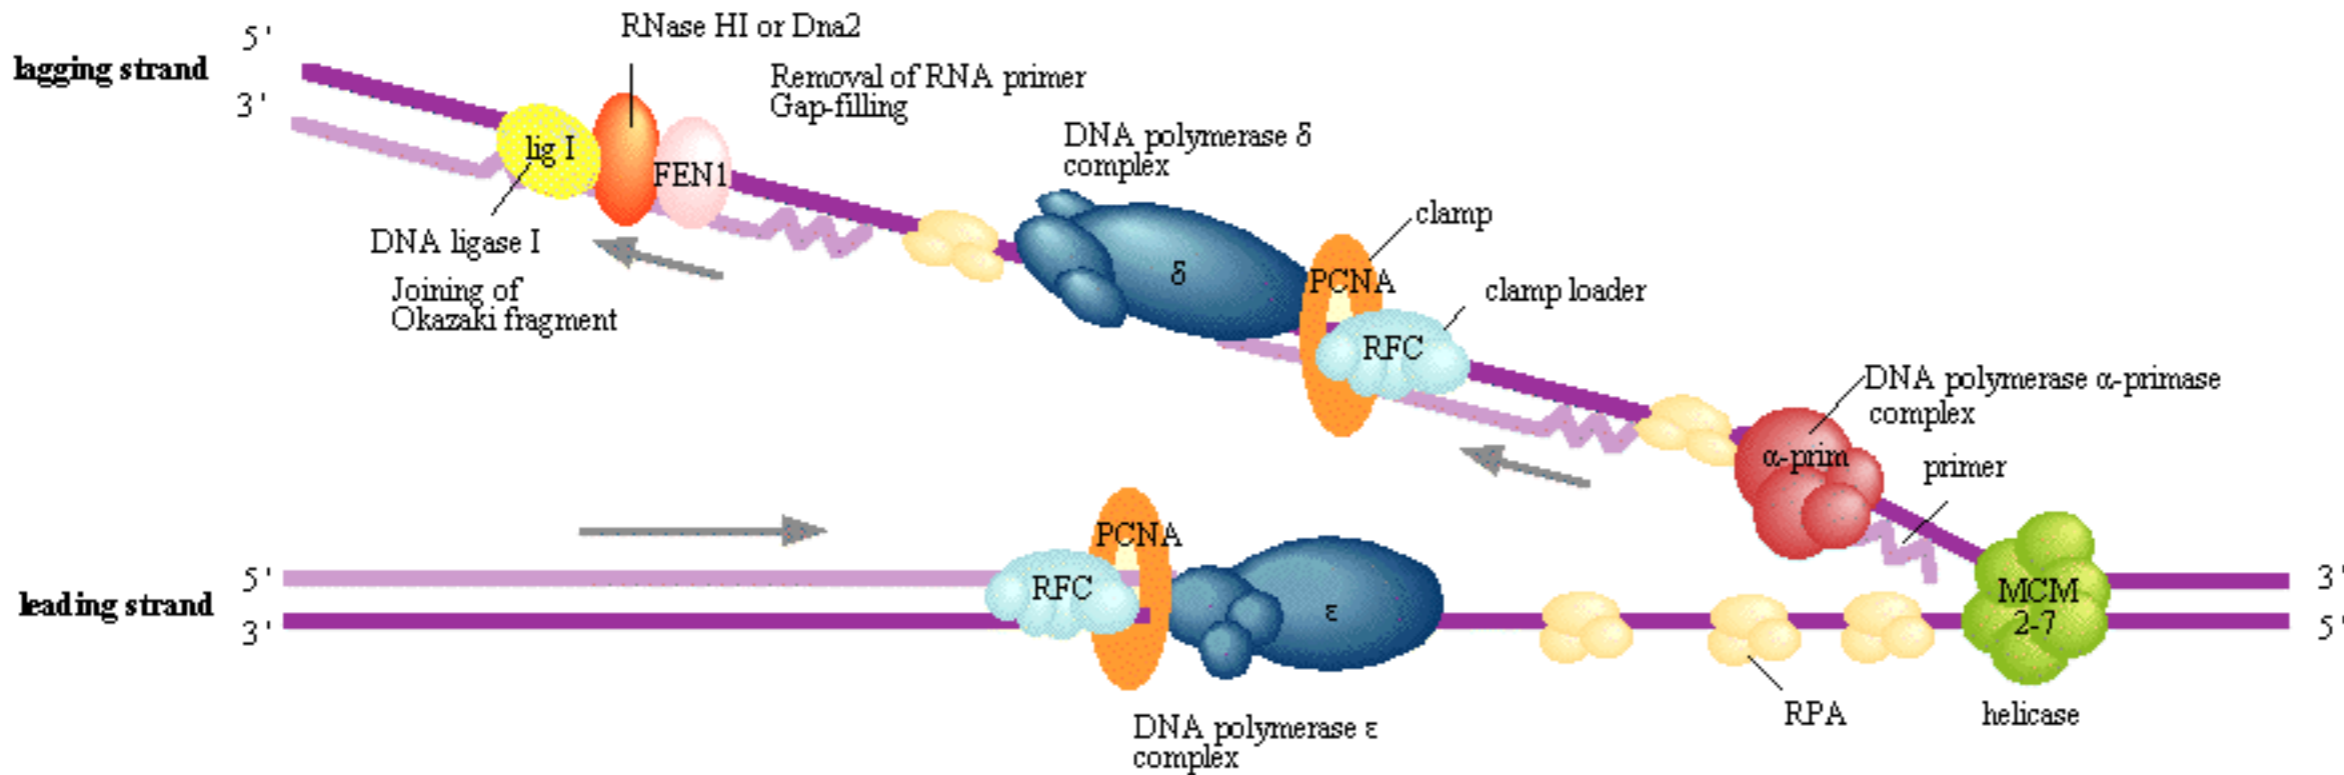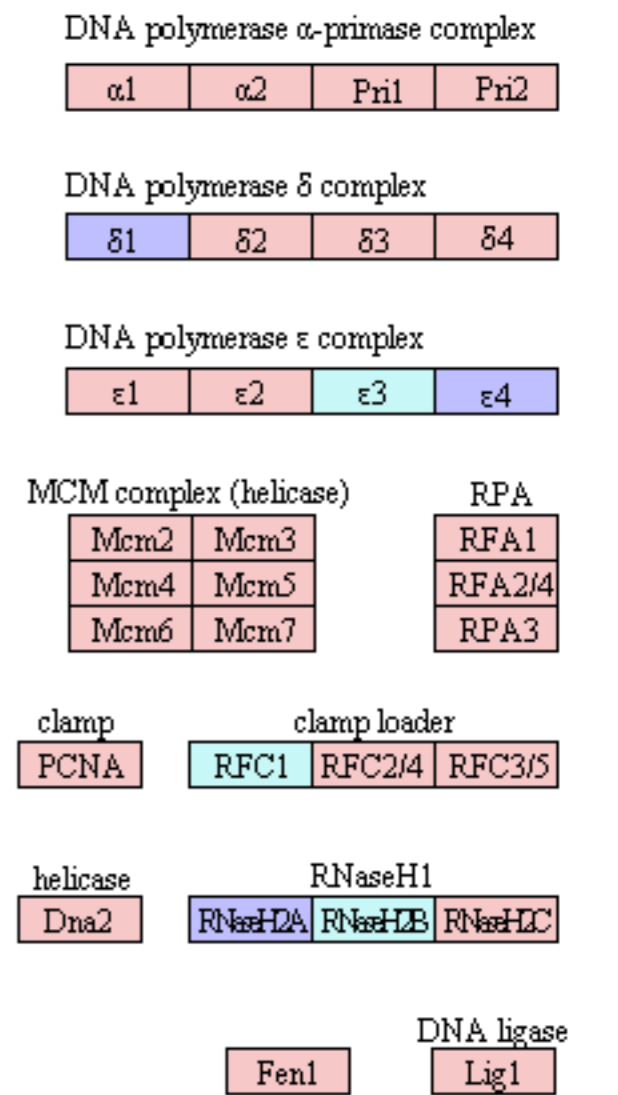

CELL CYCLE - yeast

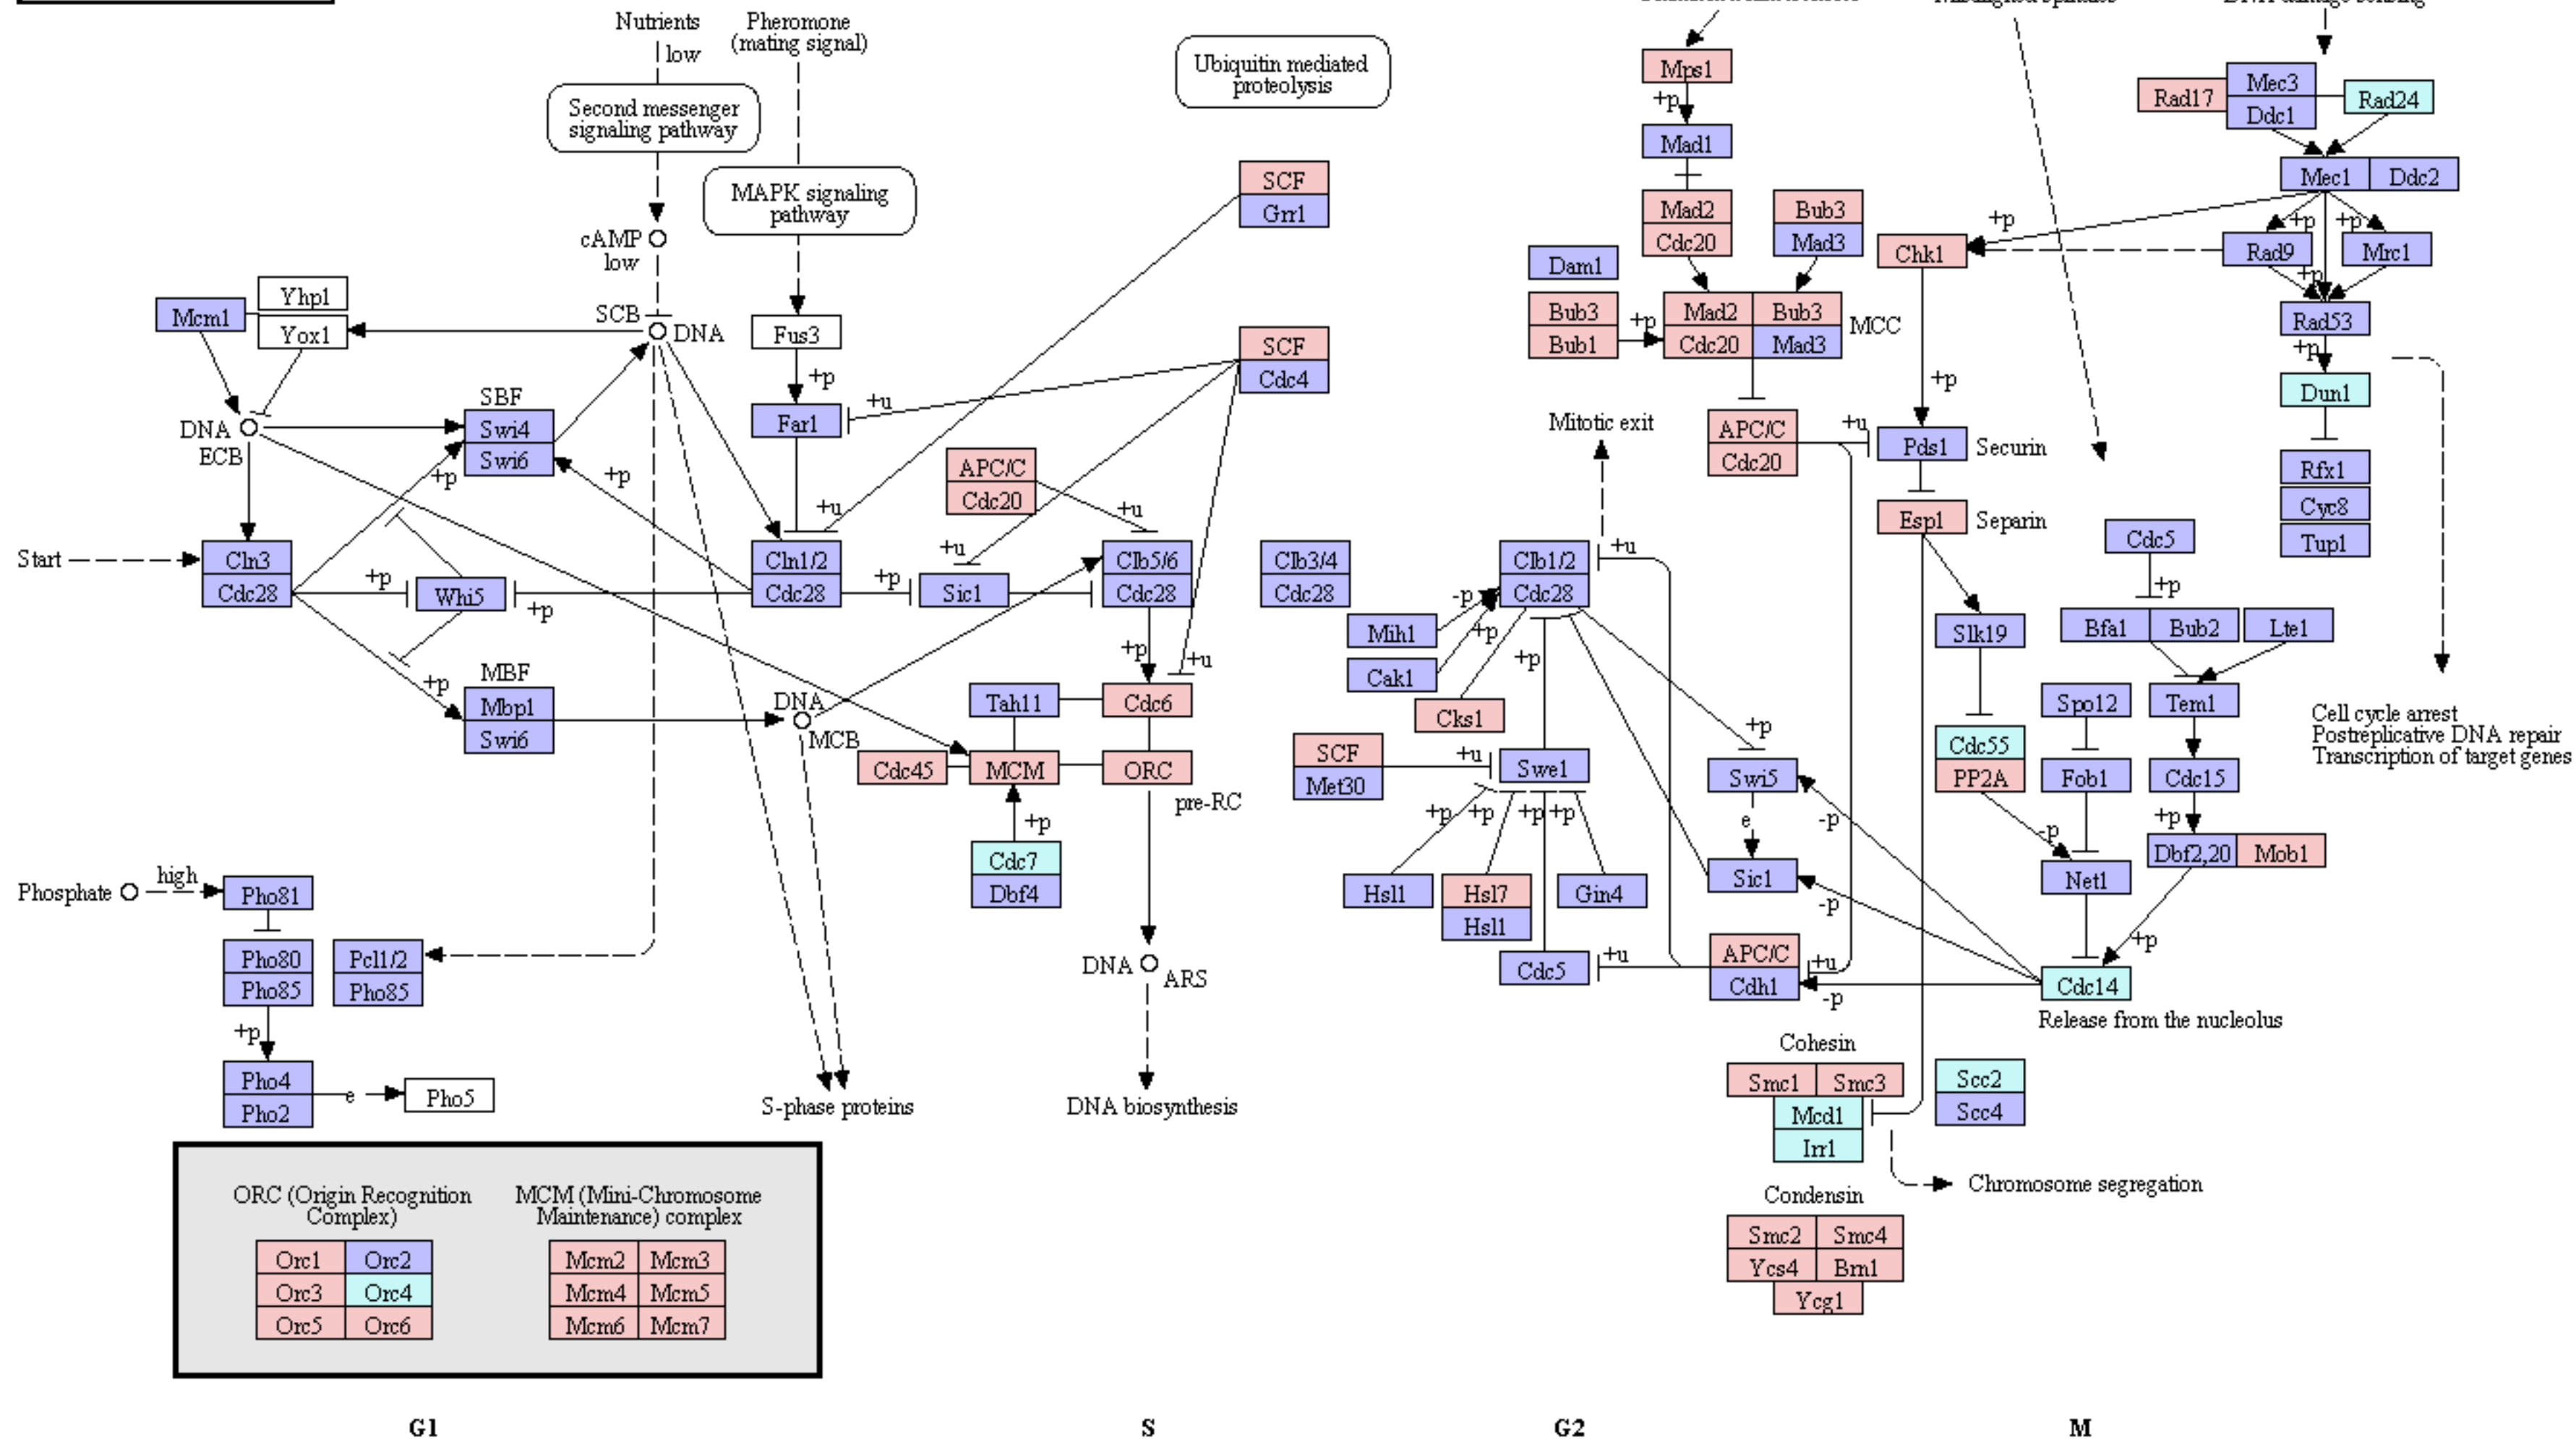

G1

S

G2

M

MEIOSIS - yeast

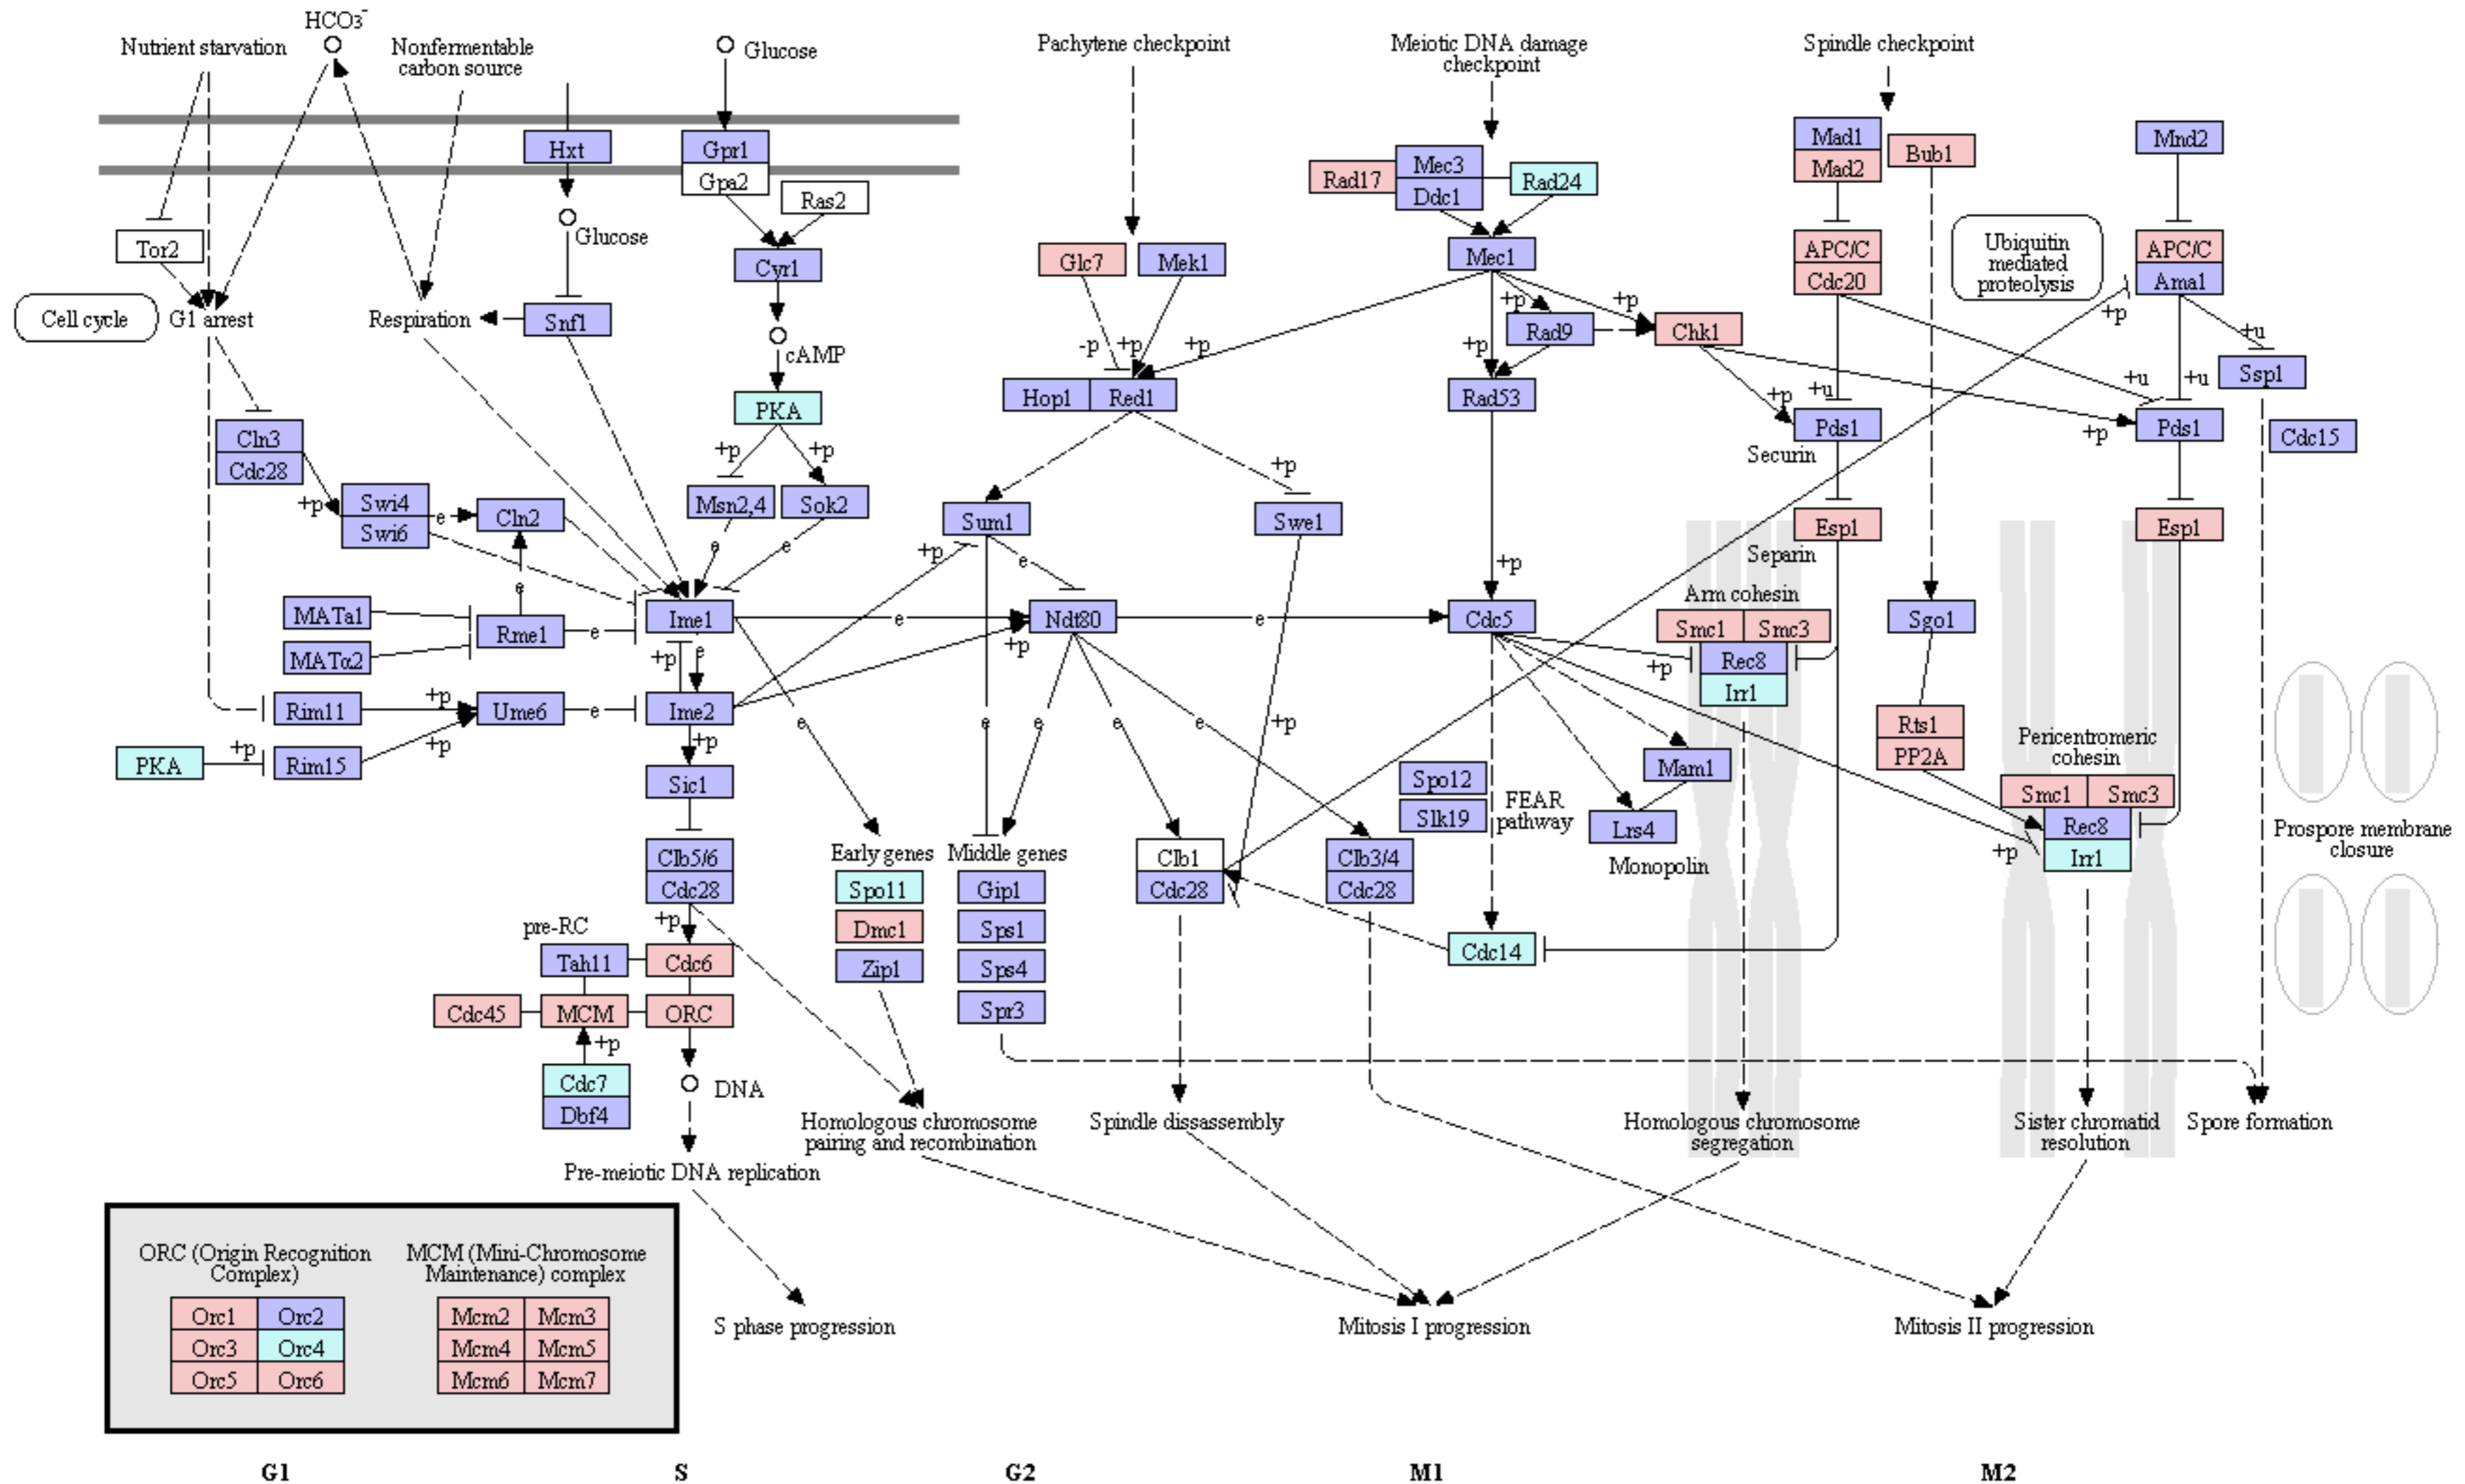

**FOCAL ADHESION**

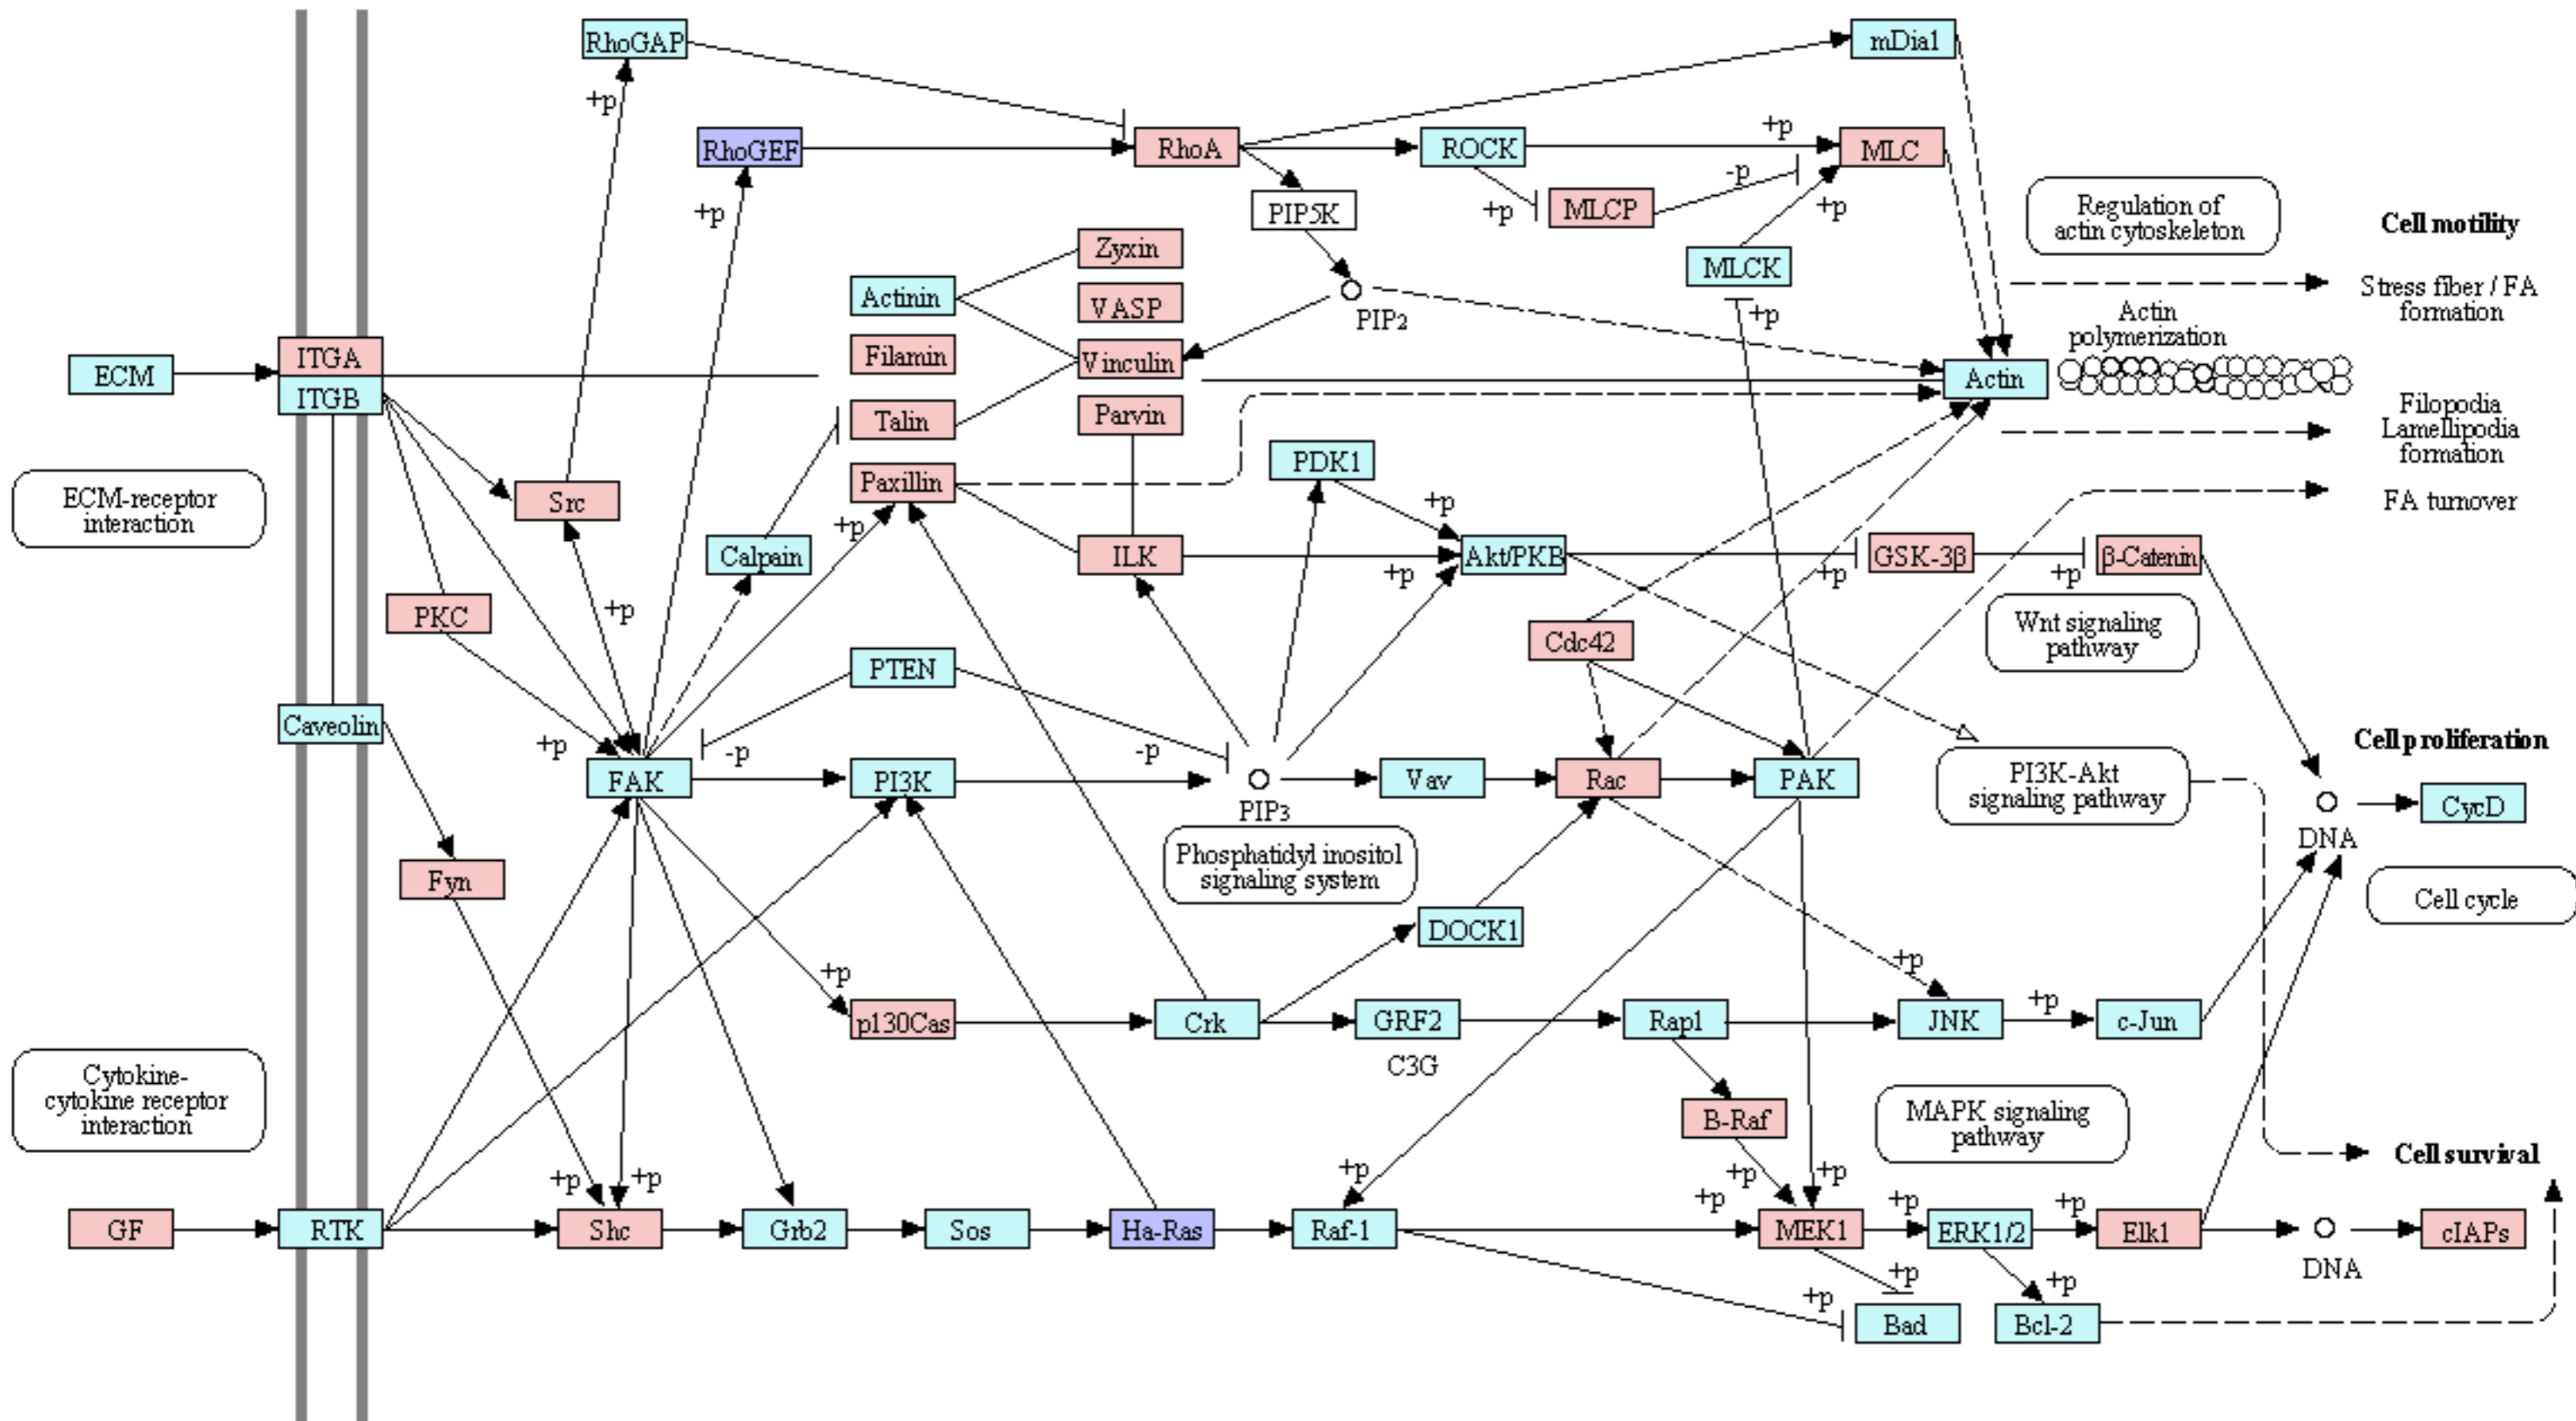



# ECM-RECEPTOR INTERACTION

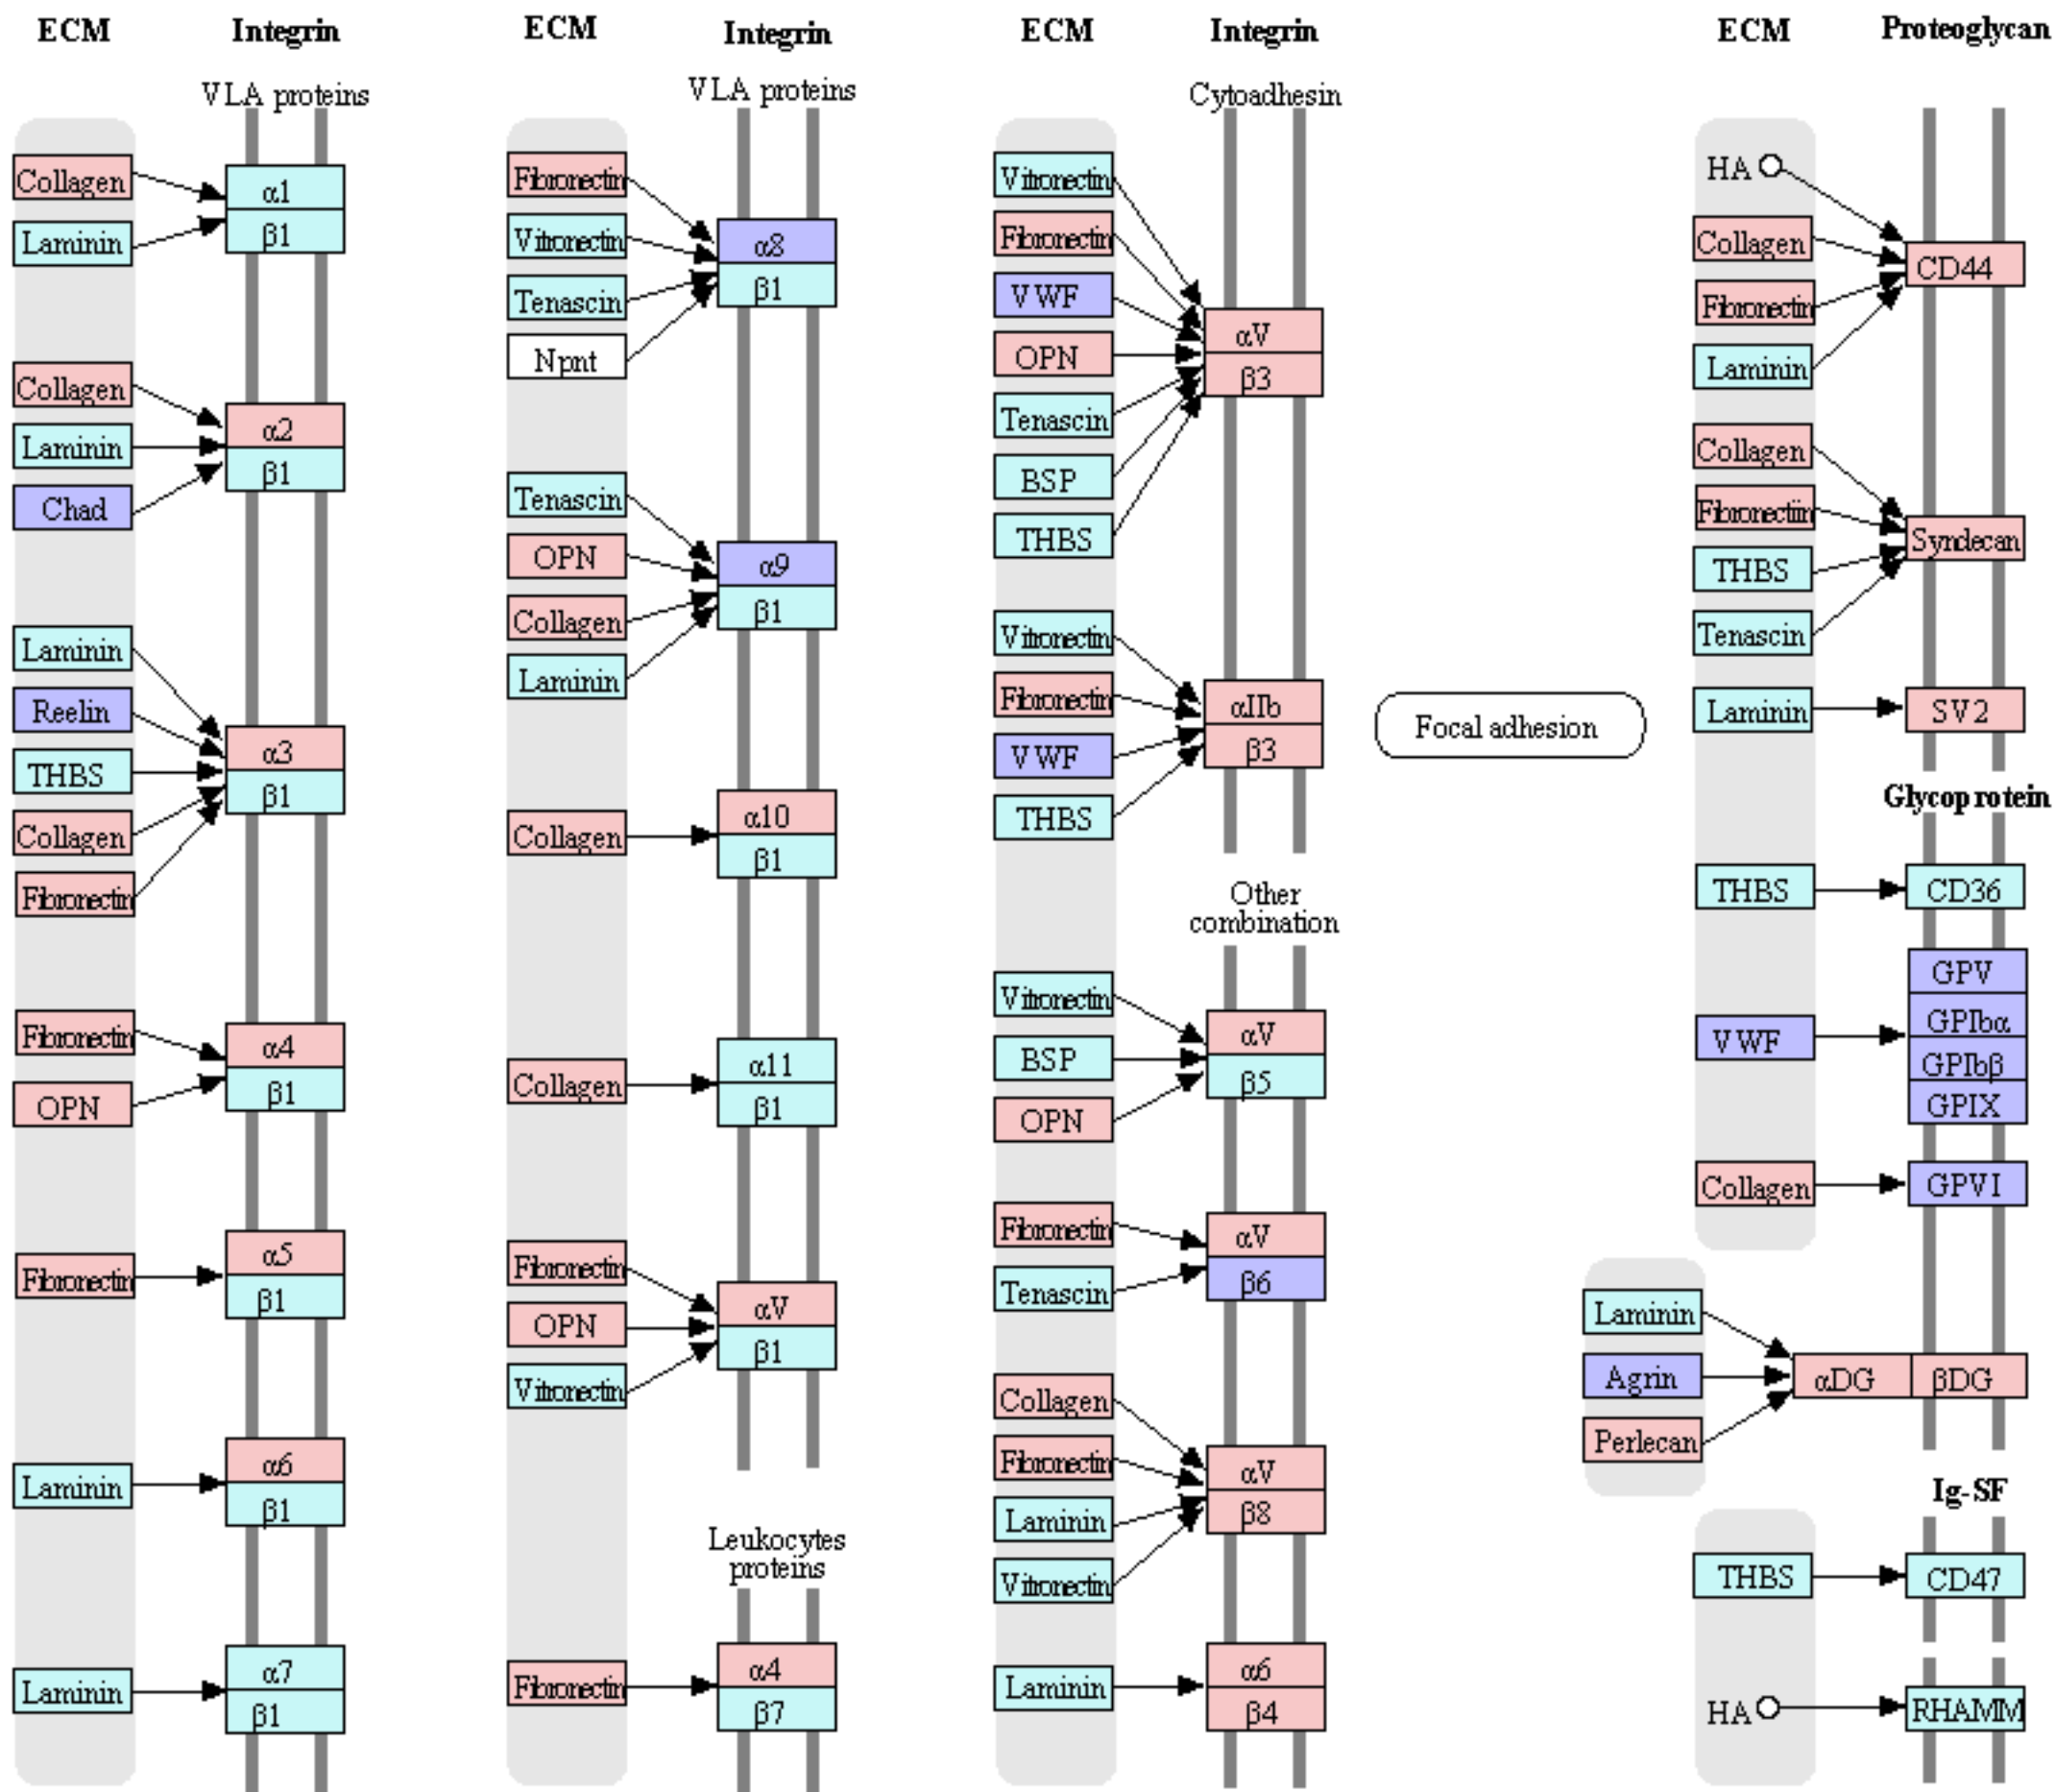

# RENAL CELL CARCINOMA

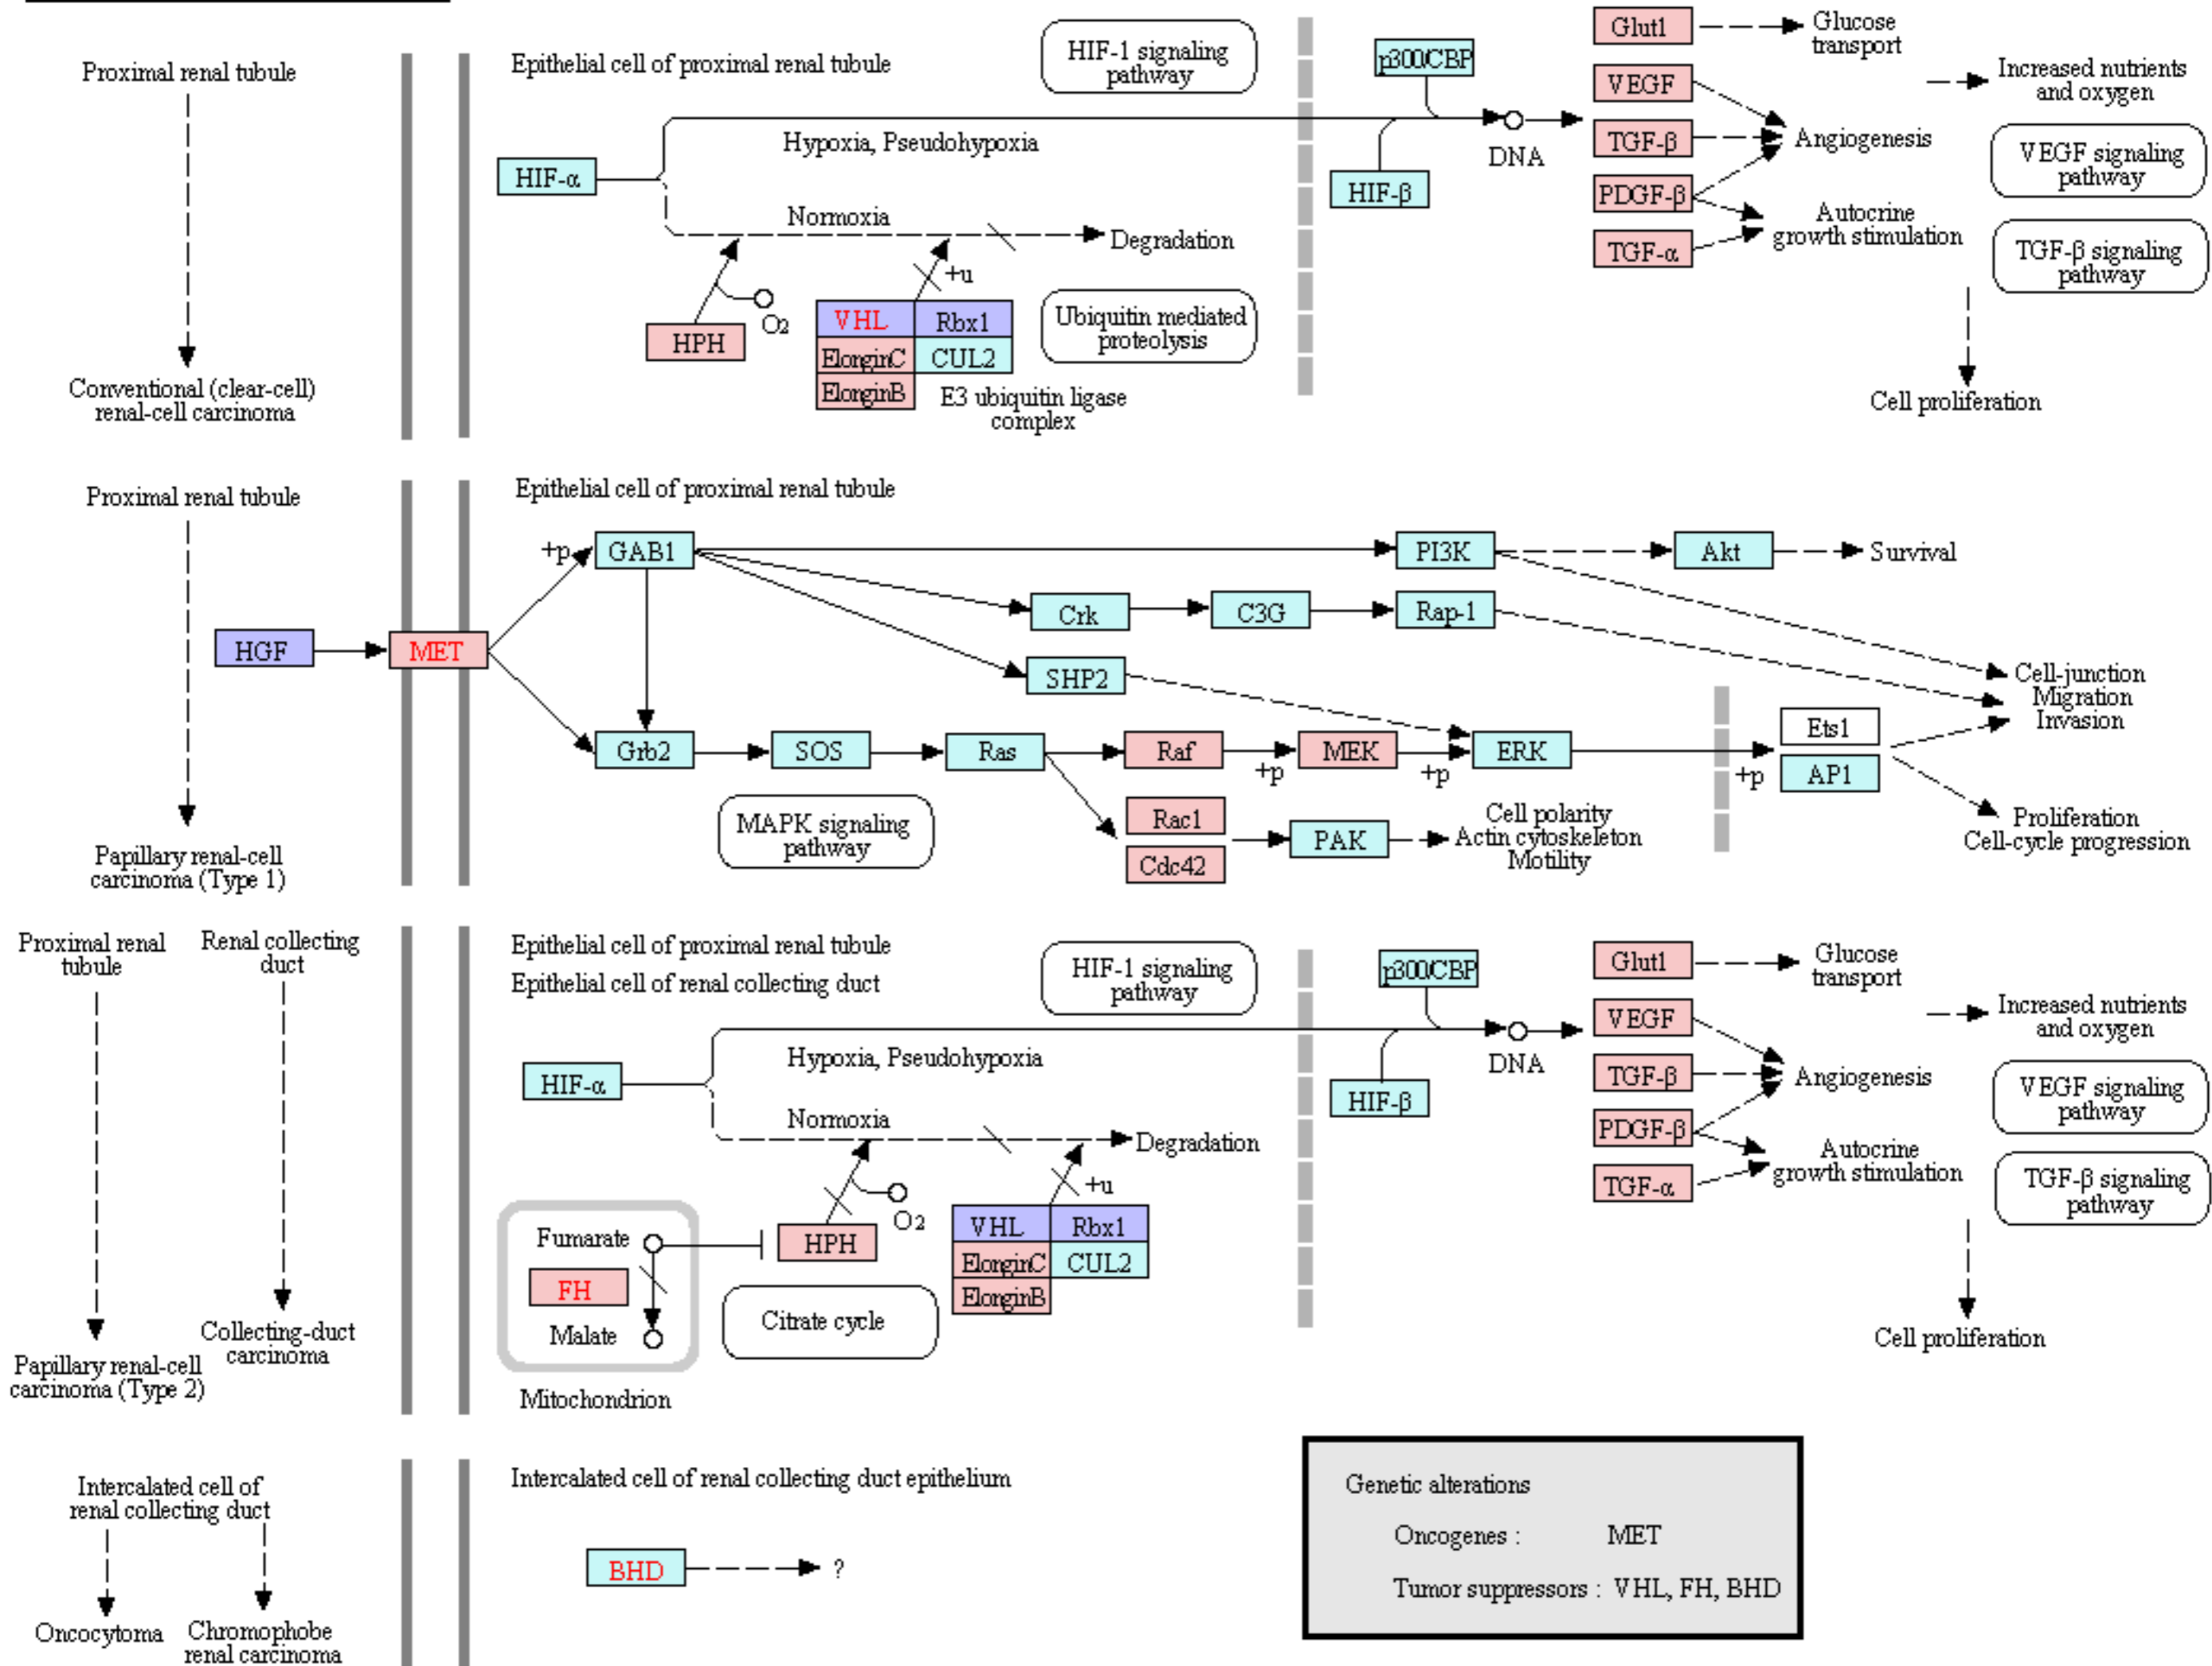

Supplement: 12864_2015_1989_MOESM12_ESM.pdf [file 12864_2015_1989_MOESM12_ESM.pdf]
