# Supplementary material for: Transcriptomic profiling of host-parasite interactions in the microsporidian Trachipleistophora hominis
Source: PubMed Central journal article supplement (PMC4654818; doi:10.1186/s12864-015-1989-z), 2015-11-21
Supplement: 12864_2015_1989_MOESM4_ESM.pdf [file 12864_2015_1989_MOESM4_ESM.pdf]

1  
JUNC00000002 ----- ACGC CATAAAGTAC TACCGTCGCA  
JUNC00000006 ----- TTGAAAAACA AAAAGTAGTC CATCACGGCA TACCGCGGT  
JUNC00000009 ----- CTAACCT TAATAGCCCT  
JUNC00000011 GCTGTTGTCA ATGATGCTCT CATTCCATCC CTTTAAATCC TCACACAGCT CCTCTTTCTC CATCTTC  
JUNC00000013 ----- GAAGAT  
JUNC00000044 ----- TGT TTGGAAAGTC GAGCGGTTCT  
JUNC00000048 ----- TTCCATCG CTTTCTCAGC AAAATCAGGA CTCGTAAATC CTACAAAACC  
JUNC00000054 -----  
JUNC00000056 ----- CGCAGGAAGA  
JUNC00000058 ----- T TATCA  
JUNC00000060 ----- TGTGGACAGA GCAAGAAGGA ----- GGATGAAGAG  
JUNC00000062 ----- AATT TGTTGGTCTG

71  
JUNC00000002 AGAAGAGGGG AA ----- CCGCTTA TCACGA ----- AGCTCCGA TAGGTAAGGC CCCCTTCGCA  
JUNC00000006 GGAGAAGGTT GTTATGCCTA ----- CGGTGA AGACAAAGAA TTGGTACTGA AAAATCAAGA ACCTAAAAAA  
JUNC00000009 AGTAAATCTA ACCTAACCTC TAACCCCTAAG TCAAACCCCTA ATTCTACTAA CCCCTCTAAAC CCTA  
JUNC00000011 ----- TCGCCCATC ----- CCGTCTT TCATAATGCTG CCGCTCCTG TGCAATGATC TCCCTGCGCT  
JUNC00000013 TAAGGGGGTT GAACGCCTTA GAGACACCGT TAAATATTTT TACGGGTGTA TTGGTAAAGT AGAGAGCGTT  
JUNC00000044 GGTGAAGAAG ATG ----- ACGAGAA AAAGGGTGA TCAGGATTA CAGGTA -----  
JUNC00000048 CAAGAAAAAG GTCTCACCGT ----- TCCTCAA TCGCTT ----- G TCAGTCTTCA AAAG  
JUNC00000054 ----- TCC TGAATTGATA CCCCTCTCTT  
JUNC00000056 AGAGGAGGAG GGGCTGTCCA ----- CAAATTA CGAAAA ----- TGA AAAAAACA  
JUNC00000058 ----- TTTCCCTC TACCTATCA TGGCCTGTG CTTCTACCTG ATTGTACGTA CCTT  
JUNC00000060 AAGAAGAAAG GCAAGCCTTG ----- TCCTGAG AAAGGAGGAG TATGCAGTGA GAAGGGCAAG CCTT  
JUNC00000062 GTTGGGCGG ATTCAACTTT ----- TT ----- TGA CGGGCTTGG CTGGTGGTGA A

141  
JUNC00000002 CGTGGCATAG TGCTAGAT -A AAACGTAAGT GATTCCTAAT TTAGATAGGG ACA -----  
JUNC00000006 CTTG ----- TAA TTAAAGAA -A AACCGTCCG TAA ----- GACGAAGG AAA -----  
JUNC00000009 ----- A TTCTACTAAC CCCTCTAAC CTAATCA -----  
JUNC00000011 TGTACCCCTC GTCATCAA -A GCTCTGCGC TCACGTGTGT AGTACGGCCT GCACCCGATC TGCAATGTTCT  
JUNC00000013 GATGTAGGGG GTAACGAGGA TTATAAGGGT GTGGTTTATA AGGAAGGGGT A -----  
JUNC00000044 ----- A GTCTGGGGT TCTGGTGAGG ATGATGACGA GAA -----  
JUNC00000048 -GTTACTTAA GTTAGTATCA GAACCTTCTG TCATCTCCGC TCAGTTACAC GAA -----  
JUNC00000054 CTTGCGCTGT GTTAACGCCT TCTCTTCCCT CGTCTC -----  
JUNC00000056 -CTGTAATAG AAGAAAAG -A TACCGGCGG CGAGCTGGTC ATAGAGGAGG AAA -----  
JUNC00000058 ----- CTAC CTTATCATGG CCTTGTCCCT CTACCTGATT ATCAGTACCT TCT -----  
JUNC00000060 ----- GCTCAG AATAAGACGA GCCTGTGCC TGTCTTGAGA AAGGAGGAGT ATG -----  
JUNC00000062 ----- TGA CTTATTAC -G TTTTGGGTC TGATCCTTCT CTGGCAATGT GCT -----

211  
JUNC00000002 ----- TCTG AAAATGATGA ATCTATGGTA TGATACTAAC TTTC -----  
JUNC00000006 ----- TAGTGGTA GAGCAAGAGC CGTC -----  
JUNC00000009 ----- TCCCT ACTAACCTTA ATCCAAGTTC TAACCCCAT CTAAT -----  
JUNC00000011 TAAACGTAAC GTTGTCAGT ATCCTTAAGG CGTCCCTCTT CGCCTCTATC GAGCCGAACT CTACGATCCC  
JUNC00000013 ----- GTTAATAAGG ATGTGGAGGG TAAG -----  
JUNC00000044 ----- AAAGGATG GATCAGGATT AACAT -----  
JUNC00000048 ----- CCAAG GTTGAATTA AATCATCACT TACATTTTCGC  
JUNC00000054 ----- ATTGATACCC TCTCTTCCCTT CGCC -----  
JUNC00000056 ----- TGGT GCACAAAGAA ATTGTTAGAG AGACAGTAAG CATC -----  
JUNC00000058 ----- ACCCT ATCAACCTCA TTACATTTTTT CAAC -----  
JUNC00000060 CAGTGAGAAA GACAAACCAT GCTCAGATAA AGACAAGCCT TGTC -----  
JUNC00000062 ----- G GTGGTGAATG ATTTATTACG TTTTACGGTC TGAT -----

281  
JUNC00000002 ----- AG TGGTGTAGAA GCGAAACAGC  
JUNC00000006 ----- GTCAATGAA AAG -----  
JUNC00000009 ----- CC TACTATCACT ACA -----  
JUNC00000011 GTGCTGACCA GACTGCGTAA TACGGGCATA CAGGGGTCI AACGGGAACG TACGCACGAA ATCCTTGAGC  
JUNC00000013 ----- GG TAAGAATGAG GGGATGGAAG  
JUNC00000044 ----- CA TATTTGCTGA ATG -----  
JUNC00000048 ----- CG TGTTAACGCC TTTCTCTTCCC  
JUNC00000054 ----- GA TACATTCACA AAA ----- G  
JUNC00000056 ----- CT TATCTACGCA TCCATCAAA  
JUNC00000058 ----- CC TGTCCTGAGA A -----  
JUNC00000060 ----- CC TTCTCTGGCA ATG -----  
JUNC00000062 -----

351

JUNC00000002 CCAACTCAGC TGTCCGTAAG GGTGTTAGGA TACAGCTCTG CGGAACAGGA AAGAAAAT-- -AATTGCATT  
 JUNC00000006 -GGTAACTGT AGATAGCGAA CCCGATGTCA CACTT-----GTA AAGCCITGCTC AAACCACAGA  
 JUNC00000009 -----  
 JUNC00000011 TCAATCAGGT TGCACTCGGG GATGTTGTGG AGTACCACCT TGAACTTGTC AAGGGGGTGC CCGTTGCGCT  
 JUNC00000013 GGGTAATTAA TAAGGGTGTG GTTTATAAGG AAGGGGTAAT TAATAATGAG AGGGTGATTA ATAATGAGGA  
 JUNC00000044 -----GGTAAGTCTG GCGGTTCTGG TGAGAAGAT GATGAGAAAA AGGATGGATC AGGATTGA--  
 JUNC00000048 -----TGGCAAG GAGGTCGCCA ACCTTTGCCT CAGGAGAGAG ATCGCTGATA ACAATGGTCC  
 JUNC00000054 TCGCCCTCAT TGATACC-----  
 JUNC00000056 GTAGGATAGC AGAGGATATA GCCGGTAATT TGAAG-----GAA GAGATGCGAA ATGATCTAAA  
 JUNC00000058 GGACTAATCC TTACCATCTC CCCATTATAA TAATA-----  
 JUNC00000060 -----  
 JUNC00000062 -----TGC TGGTGTTTTG GTTGTACTT-----ACAGAT GAATTTGTTT GTTTTATATT

421

JUNC00000002 CGTGCCGTAC GA-----  
 JUNC00000006 GGTGGTCAAT GTCCGGG-----  
 JUNC00000009 -----  
 JUNC00000011 GCACCCCTC GTGGTATCTA TCGTCAGCCT TGTGTGTCAT GAACCTCGCGT T  
 JUNC00000013 GGTAGTCTAT AATGAAG-----  
 JUNC00000044 -----  
 JUNC00000048 TTTTTTTCTT GTTTT-----  
 JUNC00000054 -----  
 JUNC00000056 AGTAGGATTT G-----  
 JUNC00000058 -----  
 JUNC00000060 -----  
 JUNC00000062 TTTATCTTTC TTGACGGGCA CATTACAGT TTTAGGCTCC T-----
