# Supplementary material for: Transcriptomic profiling of host-parasite interactions in the microsporidian Trachipleistophora hominis
Source: PubMed Central journal article supplement (PMC4654818; doi:10.1186/s12864-015-1989-z), 2015-11-21

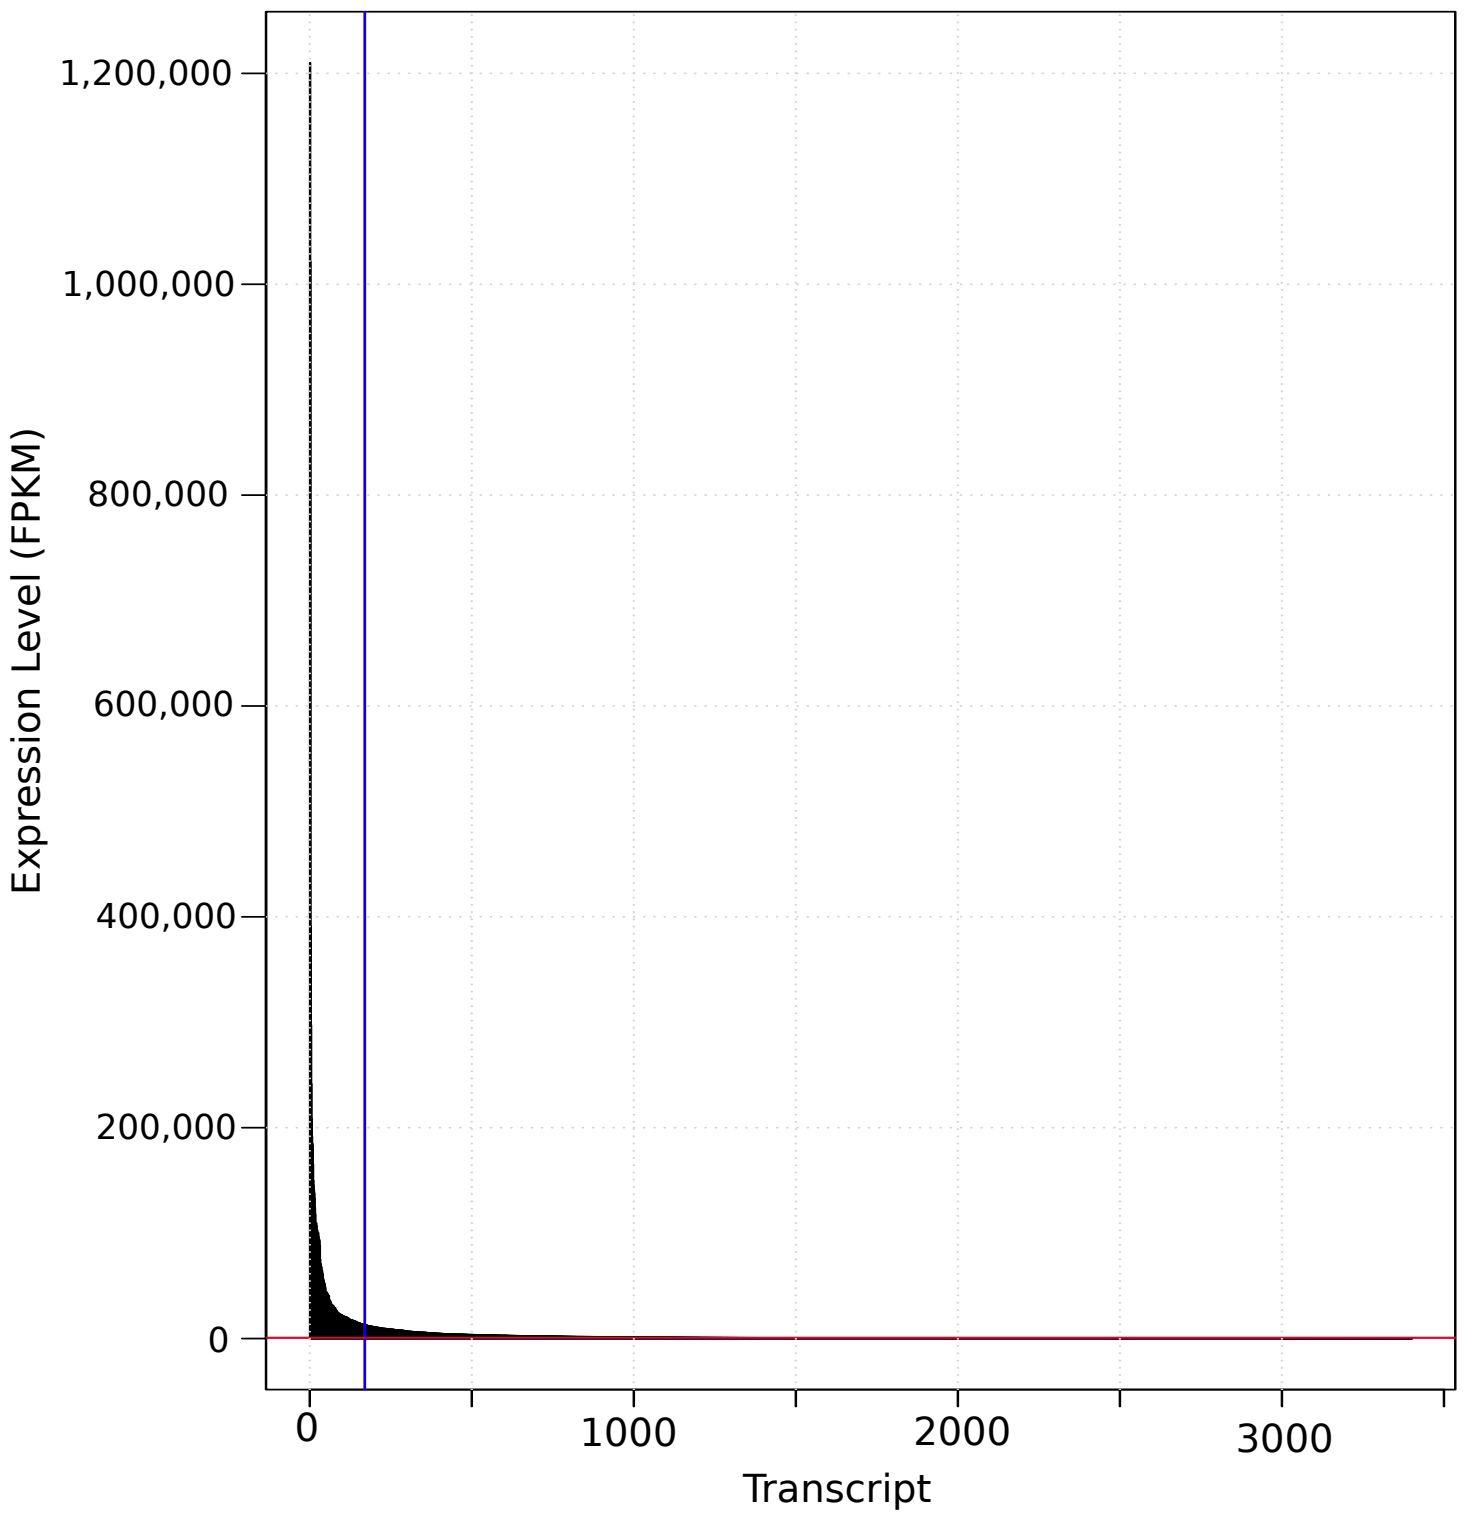

Supplement: 12864_2015_1989_MOESM5_ESM.pdf [file 12864_2015_1989_MOESM5_ESM.pdf]
