# Supplementary material for: Transcriptomic profiling of host-parasite interactions in the microsporidian Trachipleistophora hominis
Source: PubMed Central journal article supplement (PMC4654818; doi:10.1186/s12864-015-1989-z), 2015-11-21

109080521 Macaca mulatta  
 544442272 Macaca fascicularis  
 402873859 Papio anubis  
 355692572 Macaca mulatta  
 426378507 Gorilla gorilla gorilla  
 397466513 Pan paniscus  
 21753951 Homo sapiens  
 158260005 Homo sapiens

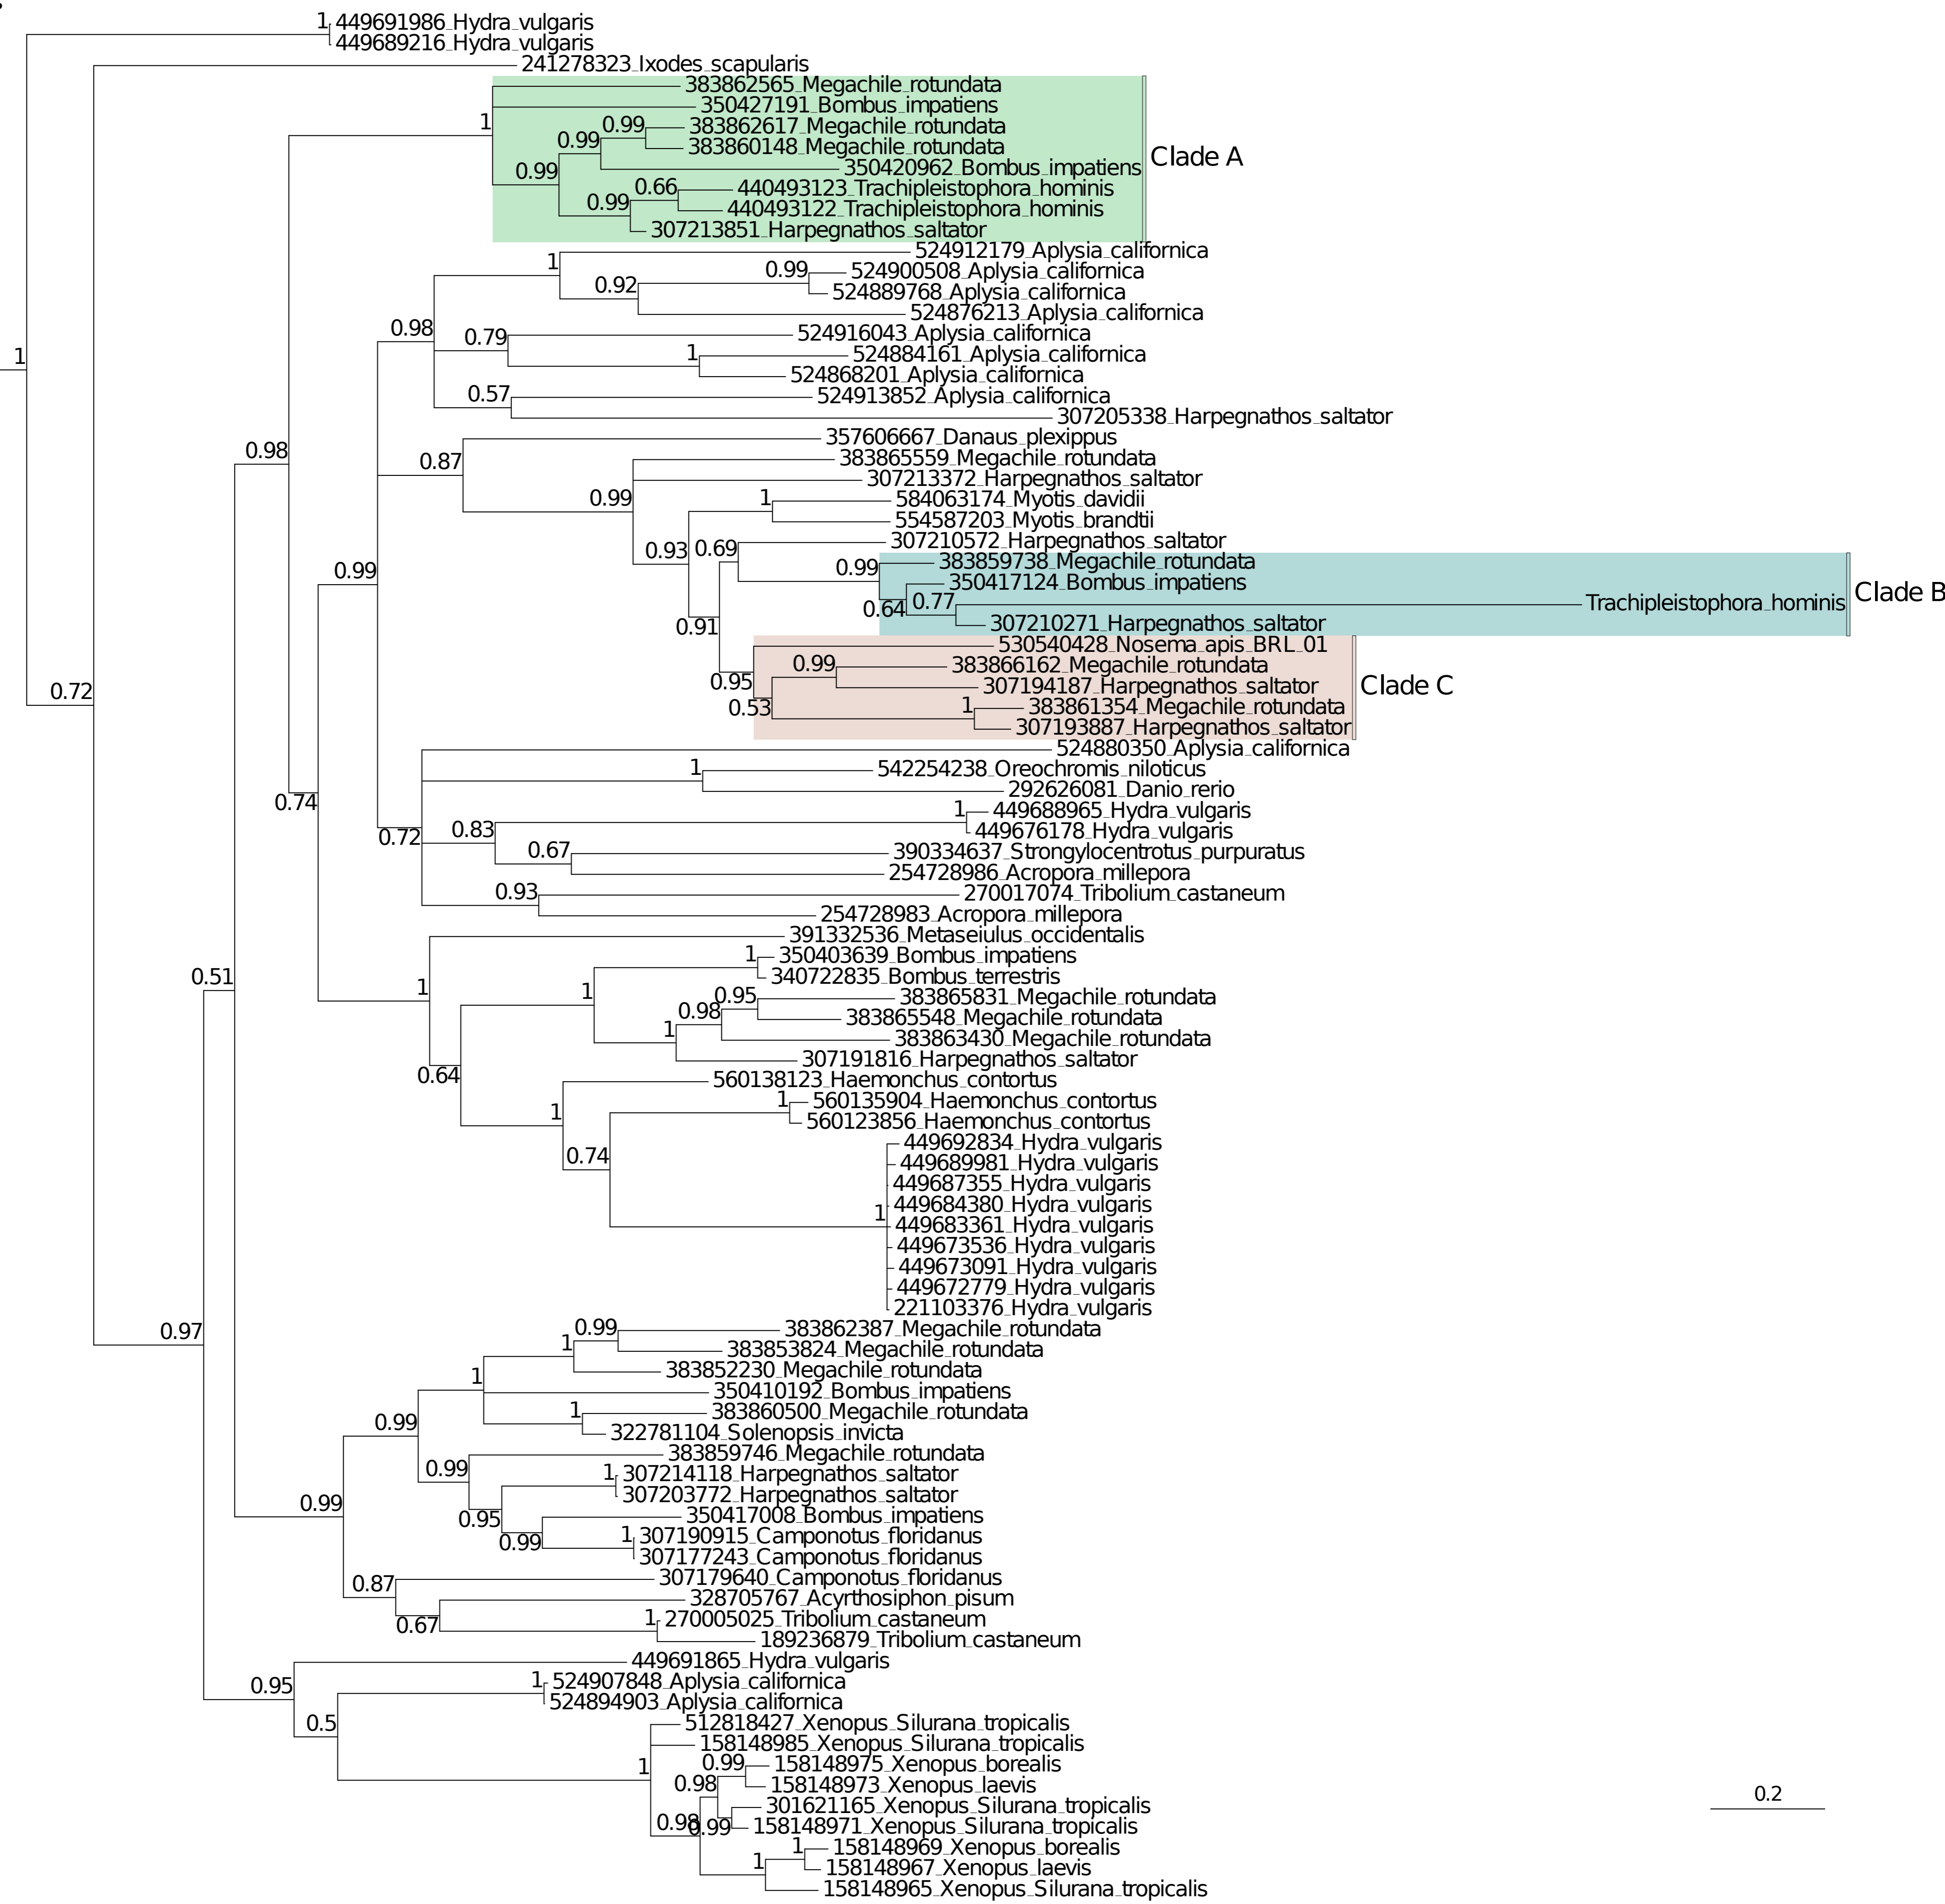

Supplement: 12864_2015_1989_MOESM8_ESM.pdf [file 12864_2015_1989_MOESM8_ESM.pdf]
